# Supplementary material for: Cell-type specific epigenetic clocks to quantify biological age at cell-type resolution
Source: publisher site journal article supplement (doi:10.18632/aging.206184), 2024-12-29
Supplement: Supplementary file [file aging-v16i22-206184-supplementary-material-SD4.pdf]

## SUPPLEMENTARY TABLES

**Supplementary Table 8. The optimal Elastic Net predictor representing the hepatocyte-specific clock.**

| Probe      | $\beta$      | Gene symbol | NCBI ID   |
|------------|--------------|-------------|-----------|
| cg02918910 | -6.017436881 | MLLT11      | 10962     |
| cg05675373 | -5.459241272 | KCNC4       | 3749      |
| cg06085726 | -2.176126012 | PLEKHG5     | 57449     |
| cg06850099 | -1.163595542 | LAMC1       | 3915      |
| cg10483534 | -11.27967918 | DISC2       | 27184     |
| cg15458155 | -2.432514762 | ODF2L       | 57489     |
| cg26883161 | 0.549543803  | RGL1        | 23179     |
| cg21211367 | 34.7997767   |             |           |
| cg24996440 | 0.556654931  |             |           |
| cg03553587 | 5.580119066  |             |           |
| cg04461197 | -7.79656029  | SPATA16     | 83893     |
| cg10719144 | -7.169039318 |             |           |
| cg11320271 | 1.542575768  | CCDC36      | 339834    |
| cg14098708 | 15.73487273  | SLC6A6      | 6533      |
| cg16978797 | 0.359053738  | ARHGEF3     | 50650     |
| cg11956467 | 6.515843914  | SORBS2      | 8470      |
| cg04670168 | 19.46881394  | MYOZ3       | 91977     |
| cg08271852 | 1.41841243   |             |           |
| cg09457131 | 0.032538949  |             |           |
| cg11801489 | 3.521123817  |             |           |
| cg14129473 | -0.357563612 | DAP         | 1611      |
| cg16016281 | 3.376959884  |             |           |
| cg26919818 | 21.54003737  | N4BP3       | 23138     |
| cg05441830 | -7.915169358 |             |           |
| cg13705956 | -2.34826709  | SMOC2       | 64094     |
| cg14111380 | -1.25046115  | GABBR1      | 2550      |
| cg09803262 | -3.796130414 | DLX6AS      | 285987    |
| cg10542223 | 13.85943901  | ZNF815      | 401303    |
| cg10741603 | 4.520953706  | SDK1        | 221935    |
| cg14646653 | 0.223822725  | GLI3        | 2737      |
| cg21329649 | -0.084885825 | MAD1L1      | 8379      |
| cg25644224 | 5.864462497  | PTPRN2      | 5799      |
| cg26836793 | -2.691338723 | RP9P        | 441212    |
| cg00935717 | -0.150122949 | ZMAT4       | 79698     |
| cg07350076 | 4.765699061  | FAM66A      | 100133172 |
| cg03020810 | 0.76432236   | TLX1        | 3195      |
| cg05719612 | 9.687510549  | CACNB2      | 783       |
| cg11478495 | 5.014419362  | PRKG1       | 5592      |
| cg14824052 | 2.470626826  |             |           |
| cg20475550 | -0.230176091 | PPP1R3C     | 5507      |
| cg20530855 | -2.132530095 |             |           |

|            |              |            |        |
|------------|--------------|------------|--------|
| cg24202448 | 9.199788218  |            |        |
| cg24353740 | 36.27907046  | KCNK18     | 338567 |
| cg09036621 | -4.604553593 | PRDM10     | 56980  |
| cg11782387 | -4.345922791 |            |        |
| cg22204050 | -6.92582377  | FAM90A1    | 55138  |
| cg24418063 | -2.75996521  | ATN1       | 1822   |
| cg06170065 | -1.035475913 |            |        |
| cg08112616 | 25.35109122  | MEG8       | 79104  |
| cg13222081 | 2.22617245   | MRPL52     | 122704 |
| cg02038233 | -6.204072378 | DUOX1      | 53905  |
| cg02736313 | -45.91000831 | MEGF11     | 84465  |
| cg09207718 | 40.84797516  | CYP1A2     | 1544   |
| cg22242148 | 8.916645472  |            |        |
| cg22492020 | 0.000210105  | TIPIN      | 54962  |
| cg23203997 | -0.425526553 |            |        |
| cg24799460 | 8.864890338  | TARSL2     | 123283 |
| cg27057329 | 1.793435599  |            |        |
| cg14696348 | -1.63049215  | MC1R       | 4157   |
| cg00735218 | -2.253242355 | DNAH17     | 8632   |
| cg19909658 | 1.643780317  | CDC6       | 990    |
| cg26749306 | -3.784572463 | METRNL     | 284207 |
| cg17192381 | 10.38975753  | BCL2       | 596    |
| cg02412123 | -20.87621835 | SIGLEC9    | 27180  |
| cg07517893 | 28.27230223  | PPP1R13L   | 10848  |
| cg21940568 | 3.440818072  | NCRNA00085 | 147650 |
| cg00633740 | -4.469064195 | EDN3       | 1908   |
| cg07474022 | 4.649140961  | SRC        | 6714   |
| cg15333674 | 5.226801949  |            |        |
| cg18170680 | 1.471564905  |            |        |

Columns label the probeID, the estimated regression coefficient, gene symbol and NCBI Identifier.

**Supplementary Table 9. The optimal Elastic Net predictor representing the liver-clock.**

| Probe      | $\beta$      | Gene symbol | NCBI ID |
|------------|--------------|-------------|---------|
| cg00147160 | 0.066771418  | CNKSRI      | 10256   |
| cg04055049 | -0.469147506 | GPR153      | 387509  |
| cg07014742 | 8.956233592  | DEDD        | 9191    |
| cg08639523 | -7.425961333 | HIST3H2BB   | 128312  |
| cg09084829 | -0.379237029 | KCNH1       | 3756    |
| cg10501085 | -0.967451996 | SLC30A2     | 7780    |
| cg11037787 | -0.216347627 | PLA2G2A     | 5320    |
| cg11837451 | -0.666694294 | KCTD3       | 51133   |
| cg19860717 | -0.063381391 | PTPN14      | 5784    |
| cg22792674 | -11.50674235 | VPS72       | 6944    |
| cg27552960 | -4.447482513 | ARF1        | 375     |

|            |              |               |           |
|------------|--------------|---------------|-----------|
| cg01138171 | -0.779451213 | ARHGEF4       | 50649     |
| cg03602297 | 1.741921083  | ALK           | 238       |
| cg03956823 | 3.411298693  | CHRND         | 1144      |
| cg11796910 | 1.9510978    | ROCK2         | 9475      |
| cg12476443 | 4.327233425  | C2orf39       | 92749     |
| cg23059725 | -7.400779735 | WDR35         | 57539     |
| cg26469081 | -0.847409586 |               |           |
| cg00480331 | 1.458519337  | BCL6          | 604       |
| cg01631215 | -2.943168366 | SUCLG2        | 8801      |
| cg17631042 | -0.044251663 | GOLGA4        | 2803      |
| cg20668838 | -2.712245058 | PCCB          | 5096      |
| cg24572577 | -3.016548007 | SLC41A3       | 54946     |
| cg02647878 | 1.045446946  | RNF175        | 285533    |
| cg15848095 | 0.705701448  |               |           |
| cg27650726 | -5.014070673 | MRFAP1L2      | 93622     |
| cg04671082 | 2.063865623  |               |           |
| cg16049600 | 0.187949221  | PCDHB11       | 56125     |
| cg01015199 | 1.635787049  | GCLC          | 2729      |
| cg16866653 | 51.19827934  | BRP44L        | 105216101 |
| cg22735834 | 17.66787787  | PPP1R14C      | 81706     |
| cg23528708 | -1.501442393 | CCDC90A       | 63933     |
| cg25589039 | 0.41920236   | C6orf70       | 55780     |
| cg02190873 | -3.651450381 | PDIA4         | 9601      |
| cg04727332 | -0.698193261 | IGFBP3        | 3486      |
| cg04841607 | 2.510801346  | C7orf33       | 202865    |
| cg07023501 | -0.382460827 |               |           |
| cg08097290 | 14.04520054  | MGC87042      | 256227    |
| cg09642951 | 28.95375853  | EPHA1         | 2041      |
| cg10548292 | 1.556617492  |               |           |
| cg21577626 | -1.052262676 | EPHB6         | 2051      |
| cg02396865 | 1.267908237  | DSCC1         | 79075     |
| cg02605601 | -0.127802997 |               |           |
| cg03069902 | 3.330232605  | C10orf12      | 84458     |
| cg15322963 | -5.642289186 | IDE           | 3416      |
| cg22576165 | 5.496227518  |               |           |
| cg24402267 | 10.10386528  |               |           |
| cg07200877 | -0.391044839 | SPRYD5        | 84767     |
| cg12139707 | -2.247439968 | ATM           | 472       |
| cg13654391 | 0.27780663   | DKFZp779M0652 | 374387    |
| cg15248242 | 1.967578063  |               |           |
| cg23030863 | -4.468072544 | JAM3          | 83700     |
| cg24742649 | -1.315776892 | OR51G1        | 79324     |
| cg14120112 | -1.819998161 | VWF           | 7450      |
| cg19535609 | 4.742022158  | LRRC43        | 254050    |
| cg22221074 | -0.373301431 | EFCAB4B       | 84766     |

|            |              |          |        |
|------------|--------------|----------|--------|
| cg27632050 | 4.193695173  | RASA3    | 22821  |
| cg04963651 | -3.046651002 | ERH      | 2079   |
| cg22831425 | 31.60062472  |          |        |
| cg25487438 | -1.253946288 | DCAF11   | 80344  |
| cg06486467 | 0.128498105  |          |        |
| cg18548762 | -10.21521945 |          |        |
| cg19642394 | -4.217757262 | UBL7     | 84993  |
| cg20901246 | 1.293243827  |          |        |
| cg22929280 | -0.856017399 | MIR549   | 69313  |
| cg02741291 | 0.666219074  | UBN1     | 29855  |
| cg05304184 | -3.141257729 |          |        |
| cg09285525 | 8.136402387  | SLC7A5   | 8140   |
| cg10150962 | -2.324888102 |          |        |
| cg27106356 | -1.512703347 | TNP2     | 7142   |
| cg01574134 | -1.648422529 | MIR636   | 693221 |
| cg04124526 | -0.360735134 | FAM171A2 | 284069 |
| cg06144469 | 7.583048847  | OTOP3    | 347741 |
| cg07142886 | 6.768928912  |          |        |
| cg13868393 | -1.535866415 | SEC14L1  | 6397   |
| cg15138339 | -0.07961536  | COASY    | 80347  |
| cg22352029 | 1.924760193  | PYY      | 5697   |
| cg02423030 | -0.805027326 | MAST1    | 22983  |
| cg06456376 | 8.581426017  |          |        |
| cg07543967 | 8.03627842   | SULT2B1  | 6820   |
| cg10604333 | 0.332748993  | ZNF222   | 7673   |
| cg13551088 | -0.045109103 | ZNF573   | 126231 |
| cg15429854 | -7.110702776 | SLC27A1  | 376497 |
| cg20118823 | 0.400570278  | TCF3     | 6929   |
| cg11399508 | -0.704090071 | DSCR9    | 257203 |
| cg01133262 | -4.790660983 | KDEL3    | 11015  |
| cg01585852 | 6.523374051  | MIF      | 4282   |
| cg07917473 | -12.28794972 |          |        |
| cg10648908 | -2.631696356 | ARFGAP3  | 26286  |
| cg15508776 | 0.276760274  | CACNA1I  | 8911   |

Columns label the probeID, the estimated regression coefficient, gene symbol and NCBI identifier.

**Supplementary Table 10. The overlap between brain cell-type specific (CTS) clocks and DamAge clock.**

| Brain CTS clock | Brain CTS clock coef | DamAge coef | Gene   | Regulatory region |
|-----------------|----------------------|-------------|--------|-------------------|
| Neu-In          | -0.004419393         | 0.670384139 | SESN2  | TSS1500           |
| Neu-In          | -0.138237554         | 0.469640644 | SGMS1  | 5'UTR             |
| Neu-In          | -0.386904875         | 0.436183395 | EPS8L2 | 5'UTR             |
| Neu-In          | 0.083751079          | 0.501032631 |        |                   |
| Neu-Sin         | -0.001363156         | 0.670384139 | SESN2  | TSS1500           |
| Neu-Sin         | 0.081413726          | 0.239157373 | ZNF642 | TSS1500           |

|          |              |              |         |                |
|----------|--------------|--------------|---------|----------------|
| Neu-Sin  | -3.016294236 | 0.469640644  | SGMS1   | 5'UTR          |
| Neu-Sin  | -15.09060534 | 0.436183395  | EPS8L2  | 5'UTR          |
| Neu-Sin  | 9.088271948  | 0.501032631  |         |                |
| Glia-In  | 0.132534035  | 0.203634862  |         |                |
| Glia-In  | -0.153640725 | 0.716232962  |         |                |
| Glia-In  | -0.019645819 | 0.794712929  | ST3GAL4 | 1stExon; 5'UTR |
| Glia-In  | -0.061458766 | -13.49218833 | CBX7    | Body           |
| Glia-Sin | 2.821787117  | 0.203634862  |         |                |
| Glia-Sin | -6.85227349  | 0.716232962  |         |                |
| Glia-Sin | 0.001254957  | 0.390334572  | TOMM40L | TSS1500        |
| Glia-Sin | -2.467746175 | 0.794712929  | ST3GAL4 | 1stExon; 5'UTR |
| Glia-Sin | -4.937783763 | -13.49218833 | CBX7    | Body           |

Columns label the probeID, the brain CTS clock, the brain CTS clock estimated regression coefficient, the DamAge clock estimated regression coefficient, the mapped gene, the mapped regulatory region.

**Supplementary Table 11. Two Neu-In clock CpGs that define cis-mQTLs with SNPs that have been associated with Alzheimer's Disease (AD).**

| CpG        | SNP       | PvalInADgwas | Chromosome | SNP_location | CpG_location | CpGmappedGene | mQTLtype |
|------------|-----------|--------------|------------|--------------|--------------|---------------|----------|
| cg24519157 | rs6024860 | 1.21E-09     | 20         | 56408730     | 56412605     | CASS4         | cis      |
| cg24519157 | rs1884913 | 3.55E-10     | 20         | 56409008     | 56412605     | CASS4         | cis      |
