# Supplementary material for: Cell-type specific epigenetic clocks to quantify biological age at cell-type resolution
Source: Aging (Albany NY). 2024 Dec 29;16(22):13452–504. doi: 10.18632/aging.206184 (PMC11723652; doi:10.18632/aging.206184)
Supplement: Supplementary Tables 1-7 [file aging-16-206184-s003.xls]

## Sheet: Supplementary Table 1
Supplementary Table 1. DNAm datasets used in neuron and brain clock construction and validation. Columns label accession number, cohort name, cell and/or tissue-type, Diseases included, number of sample used in this work, number of control (healthy) samples, number of cases (disease), for what purpose the cohort was used, data-type, technology, and whether the cohort was used in the various meta-…
Accession	Cohort	Cell-type/Tissue-type	Diseases included	n(Samples used)	n(Control)	n(Case)	Usage for cell-type specific clock construction	Usage for quantifying intrinsic/extrinsic aging components	Data type	Technology	CTF~Age	CTF~Gender	CTF~AD	AA~AD
GSE112179	Pai	Neu (PFC)	BD, SCZ	33	33	67	Clock validation and specificity test	Not used	Sorted	EPIC	N	N	N	N
GSE66351	Gasparoni	Neu, Glia (OL)	AD	32	32	30	Clock validation and specificity test	Not used	Sorted	450K	N	N	N	N
GSE98203	Kozlenkov	Neu (PFC)	Heroin or suicide	29	29	59	Clock validation and specificity test	Not used	Sorted	450K	N	N	N	N
GSE41826	Guintivano	Neu, Glia (PFC)	None	58	58	0	Clock validation and specificity test	Not used	Sorted	450K	N	N	N	N
GSE234520	Hannon	Neu, Glia subtypes (PFC)	None	103	103	0	Clock validation and specificity test	Not used	Sorted	EPIC	N	N	N	N
GSE191200	Witte	Glia (MFG, STG, SVZ, THA)	BD, SCZ, MDD	20	20	36	Clock validation and specificity test	Not used	Sorted	EPIC	N	N	N	N
GSE74193	Jaffe	PFC	SCZ	416	226	190	Clock construction (training)	Intrinsic/extrinsic brain clock training	Bulk	450K	Y	Y	N	N
GSE203332	Philstrøm	PFC	Various mental disease and neurodegenerative disease	67	67	375	Clock construction (model selection)	Intrinsic/extrinsic brain clock testing	Bulk	EPIC	Y	Y	N	N
GSE125895	Semick	DLPFC, Hippo, EC, CRB	AD	208	187	82	Clock validation and specificity test	Intrinsic/extrinsic brain clock testing	Bulk	450K	Y	Y	Y	Y
GSE43414	Pidsley	PFC, EC, STG	AD	192	71	179	Clock validation and specificity test	Intrinsic/extrinsic brain clock testing	Bulk	450K	Y	Y	Y	Y
GSE80970	Smith	PFC, STG	AD	286	138	148	Clock validation and specificity test	Intrinsic/extrinsic brain clock testing	Bulk	450K	Y	Y	Y	Y
GSE72778	Horvath	FL, TL, PL, MC, SC, VC, CG	AD, HD	139	95	205	Clock validation and specificity test	Intrinsic/extrinsic brain clock testing	Bulk	450K	Y	Y	Y	Y
GSE66351	Gasparoni	FL, TL	AD	128	52	76	Clock validation and specificity test	Intrinsic/extrinsic brain clock testing	Bulk	450K	Y	Y	Y	Y
GSE76105	Watson	STG	AD	68	34	34	Clock validation and specificity test	Not used	Bulk	450K	Y	Y	Y	Y
GSE134379	Brokaw	MTG, CRB	AD	583	358	450	Clock validation and specificity test	Not used	Bulk	450K	Y	Y	Y	Y
GSE88890	Murphy	PFC	MDD	38	38	37	Clock validation and specificity test	Intrinsic/extrinsic brain clock testing	Bulk	450K	N	N	N	N
GSE143157	Rydbirk	PFC	MSA	37	37	41	Clock validation and specificity test	Intrinsic/extrinsic brain clock testing	Bulk	EPIC	N	N	N	N
GSE128601	Torabi	PFC	SCZ	50	50	75	Clock validation and specificity test	Intrinsic/extrinsic brain clock testing	Bulk	450K	N	N	N	N
GSE49393	Xu	PFC	AUD	25	25	23	Clock validation and specificity test	Intrinsic/extrinsic brain clock testing	Bulk	450K	N	N	N	N
GSE40360	Huynh	WM of FL	Multiple sclerosis	19	19	27	Clock validation and specificity test	Intrinsic/extrinsic brain clock testing	Bulk	450K	N	N	N	N
GSE89703	Viana2	Hippo	SCZ	13	13	14	Clock validation and specificity test	Not used	Bulk	450K	N	N	N	N
GSE89705	Viana3	Stria	SCZ	17	17	16	Clock validation and specificity test	Not used	Bulk	450K	N	N	N	N
GSE89706	Viana4	Stria	SCZ	28	28	21	Clock validation and specificity test	Not used	Bulk	450K	N	N	N	N
GSE147040	Markunas	NAc	None	221	221	0	Clock validation and specificity test	Not used	Bulk	EPIC	N	N	N	N
GSE89702	Viana1	CRB	SCZ	17	17	16	Clock validation and specificity test	Not used	Bulk	450K	N	N	N	N
GSE137222	Stefania1	CRB	Suicide	37	37	21	Clock validation and specificity test	Not used	Bulk	EPIC	N	N	N	N
GSE137223	Stefania2	CRB	Suicide	15	15	18	Clock validation and specificity test	Not used	Bulk	450K	N	N	N	N
GSE123995	Park	Hepatocyte	None	55	55	0	Clock validation and specificity test	Not used	Bulk	EPIC	N	N	N	N
GSE79100	Joseph	Kidney	None	93	93	0	Clock validation and specificity test	Not used	Bulk	450K	N	N	N	N
GSE76938	Kirby	Prostate	Cancer	51	51	72	Clock validation and specificity test	Not used	Bulk	450K	N	N	N	N
GSE131013	Díez	Colon	Cancer	96	96	144	Clock validation and specificity test	Not used	Bulk	450K	N	N	N	N
GSE56581	Reynolds	CD4T	None	214	214	0	Clock validation and specificity test	Not used	Bulk	450K	N	N	N	N
GSE56046	Reynolds	Mono	None	1202	1202	0	Clock validation and specificity test	Not used	Bulk	450K	N	N	N	N
GSE147740	Airway	Whole blood	None	1032	1032	0	Clock validation and specificity test	Intrinsic/extrinsic WB clock training	Bulk	EPIC	N	N	N	N
GSE179325	Barturen	Whole blood	SARS	101	101	473	Clock validation and specificity test	Intrinsic/extrinsic WB clock testing	Bulk	EPIC	N	N	N	N
GSE61151	Flanagan	Whole blood	None	184	184	0	Clock validation and specificity test	Intrinsic/extrinsic WB clock testing	Bulk	450K	N	N	N	N
GSE80417	Hannon1	Whole blood	SCZ	304	304	332	Clock validation and specificity test	Intrinsic/extrinsic WB clock testing	Bulk	450K	N	N	N	N
GSE84727	Hannon2	Whole blood	SCZ	405	405	260	Clock validation and specificity test	Intrinsic/extrinsic WB clock testing	Bulk	450K	N	N	N	N
GSE40279	Hannum	Whole blood	None	656	656	0	Clock validation and specificity test	Intrinsic/extrinsic WB clock testing	Bulk	450K	N	N	N	N
GSE87571	Johansson	Whole blood	None	729	729	0	Clock validation and specificity test	Intrinsic/extrinsic WB clock testing	Bulk	450K	N	N	N	N
GSE55763	Lehne	Whole blood	None	2707	2707	0	Clock validation and specificity test	Intrinsic/extrinsic WB clock training	Bulk	450K	N	N	N	N
GSE106648	LiuMS	Whole blood	Multiple Scleroris	139	139	140	Clock validation and specificity test	Intrinsic/extrinsic WB clock testing	Bulk	450K	N	N	N	N
GSE42861	LiuRA	Whole blood	Rheumatoid arthritis	335	335	354	Clock validation and specificity test	Intrinsic/extrinsic WB clock testing	Bulk	450K	N	N	N	N
Requested Access	TZH	Whole blood	Different health conditions	85	85	620	Clock validation and specificity test	Intrinsic/extrinsic WB clock testing	Bulk	EPIC	N	N	N	N
GSE87648	Ventham	Whole blood	Inflammatory bowel disease	101	101	279	Clock validation and specificity test	Intrinsic/extrinsic WB clock testing	Bulk	450K	N	N	N	N
GSE72680	Zannas	Whole blood	Trauma	144	144	278	Clock validation and specificity test	Intrinsic/extrinsic WB clock testing	Bulk	450K	N	N	N	N
Abbr: Neu: neuron; Glia: glia cell; FL: frontal lobe; TL: temporal lobe; OL: occipital lobe; PL: parietal lobe; PFC: prefrontal cortex; DLPFC: dorsolateral prefrontal cortex; MFG: medial frontal gyrus; MC: motor cortex; STG: superior temporal gyrus; MTG: medial temporal gyrus; SC: sensory cortex; VC: visual cortex; WM: white matter; EC: entorhinal cortex; Hippo: hippocampus; THA: thalamus; Stria:…

## Sheet: Supplementary Table 2
Supplementary Table 2. The optimal Elastic Net predictor representing the Neu-In clock. Columns label the probeID, the estimated regression coefficient, gene symbol and NCBI Identifier.
Probe	β	Gene Symbol	NCBI ID
cg20251225	0.0221588	CDK11B;LOC728661	984;NA
cg21005416	-0.00642925	ECE1	1889
cg10442729	0.0198829
cg17343483	-0.269771	SEMA4C	54910
cg20361600	-0.00962191	DLX2	1746
cg25223552	-0.082077
cg15593298	0.146169	PAQR9	344838
cg22702772	0.333749	CELSR3	1951
cg26856080	0.203492	TRIM59	286827
cg10444491	-0.0420008	SORCS2	57537
cg18171715	0.175518	GAK	2580
cg18377044	0.202441
cg18586891	0.297841	TMEM175	84286
cg15690342	1.96477e-06
cg25108022	0.31263	DUSP1	1843
cg08692175	-0.0379751
cg15391433	-0.0198077	TRRAP	8295
cg02324367	0.0563419	ARHGEF10	9639
cg05492433	-0.0933353	COL22A1	169044
cg07004744	0.0499854	ERICH1	157697
cg07570470	0.00208975
cg16241714	0.563169	CEBPD	1052
cg21287554	0.0770823	PEBP4	157310
cg00712627	0.0235635
cg04913109	0.0257229	INPP5A	3632
cg18193259	0.0892142	SLIT1	6585
cg01097384	0.117496
cg18728264	0.0415569	CXCR5	643
cg23623667	-0.115827	KCNQ1	3784
cg01866431	-0.216016	GLT1D1	144423
cg03310242	0.0741337	FKBP4	2288
cg09313745	0.00574241	TSPAN9	10867
cg09567735	0.355487	CUX2	23316
cg12939648	0.0395331
cg25208479	-0.039604
cg25649641	0.288562
cg01277542	-0.0116479	SLC6A2	6530
cg02313331	0.0860688	SLC7A5P1	81893
cg06459921	0.0899553	ZNF598	90850
cg22183053	-0.0771231	EPN2	22905
cg23148631	-0.144932
cg24364564	0.0293515	GJD3	125111
cg05080154	0.113761	SALL3	27164
cg12845895	0.130855	PQLC1	NA
cg15410236	0.0407967	ARID3A	1820
cg00309582	-0.114931	BMP7	655
cg12283302	-0.311309
cg16810054	-0.031415	TP53INP2	58476
cg01961447	0.166454	GALR3	8484
cg00105640	-0.0150056	LOC388588	NA
cg00177797	0.0499899	LHX4	89884
cg00365524	0.00119996	HTR6	3362
cg01915081	-0.00273514	LCE1F	353137
cg01925498	-0.0420732
cg02173484	0.151878	GJA5	2702
cg02625804	0.0543229	KIAA1026	NA
cg02693688	0.0164376	LOC100133612;C1orf174	NA;339448
cg03371205	-0.202987	LYPLA2	11313
cg04746890	-0.00367444
cg05308979	0.0330688	C1QC	714
cg05602648	0.159911	COG2	22796
cg06754224	-0.00441939	SESN2	83667
cg06968741	-0.0284565	ACTN2	88
cg07159230	0.0412799	CASZ1	54897
cg07978029	-0.294031
cg08185345	-0.0378681	EFNA3	1944
cg08612871	0.000109619	GJB5	2709
cg09131339	-0.475133	SORT1	6272
cg09502502	-0.0471618	PSRC1	84722
cg09674468	0.0166482	SLC35F3	148641
cg09938164	0.119704	WNT4	54361
cg10632229	-0.0673743	H3F3A;LOC440926	NA
cg10806711	0.113889	FAM19A3	NA
cg11334004	-0.255628	MFSD4	NA
cg11377047	-0.00662038	MIR1976;RPS6KA1	100302190;6195
cg11735311	0.00882431
cg12604162	0.0198713	KCNAB2	8514
cg12810233	0.199672	GFI1	2672
cg13493250	-0.0323911	LCE1F	353137
cg13502252	0.0345175
cg13551754	0.0188123	ECE1	1889
cg14655122	0.274636	RAP1GAP	5909
cg15114328	-0.0690558	GLUL	2752
cg15201877	0.0879098	PTGER3	5733
cg16357582	-0.195086	CSRP1	1465
cg17241310	0.139492	BARHL2	343472
cg17282145	-0.0599763	C1orf198	84886
cg17476910	0.304043
cg17845761	0.000403483	KIAA0040	9674
cg17934948	-0.0543286	KCNK2	3776
cg19367256	-1.00404e-05	IGSF21	84966
cg20136855	0.0388707	TNFRSF1B	7133
cg20287514	-0.0173016	LDLRAP1	26119
cg20288565	0.070354	GNG4	2786
cg22224597	0.0437215	CTPS	NA
cg22796458	1.91938e-06	UBQLN4	56893
cg23082387	0.0633942	CAMTA1	23261
cg23241456	-0.0672817	CACNA1E	777
cg23588217	0.0743088	TBX15	6913
cg24254842	0.119437	HIVEP3	59269
cg24555071	0.00172258	LOC441869	NA
cg25193276	0.156856
cg25773695	0.000511993	VANGL1	81839
cg27396830	0.0260031	C1orf187	NA
cg00754604	-0.00036486	RBMS1	5937
cg01698448	-0.149425
cg02375320	0.345192	SFRS7	NA
cg02466815	-0.0394604	HOXD1	3231
cg05208178	0.148867	INPP5D	3635
cg07476327	-0.056605
cg07720856	0.0484855	PTMA	5757
cg08390172	-0.0501997	SDPR	NA
cg09058748	0.0998902	CD8A	925
cg09154256	0.000131215	RAB1A	5861
cg12910906	-0.08898	ARHGEF4	50649
cg13803976	-0.0415691	CD8A	925
cg14247287	-0.13062	NEURL3	93082
cg16829809	-0.0979151
cg17165848	-0.0503881	WIPF1	7456
cg18913332	-0.00660925
cg18989909	0.00922005
cg19638398	-0.0540086	MYEOV2	NA
cg19821872	0.179062
cg20751706	-0.0650464	TNS1	7145
cg22344631	-0.0763075
cg25946605	0.129949	CYS1	192668
cg26002103	0.136495	DLX2	1746
cg26009035	0.190988	CHCHD5	84269
cg00489219	0.224452	ZNF621	285268
cg03447908	0.00571567	CLEC3B	7123
cg04006061	-0.00433598	GP5	2814
cg04834794	0.901627
cg04884090	0.00100637	TRAIP	10293
cg06090362	0.0388794	TRIM42	287015
cg06759518	0.322977	RYBP	23429
cg07439618	0.000757666	SCN5A	6331
cg08013793	-0.077812	CAMKV	79012
cg13903087	0.0528482	ERC2	26059
cg16282527	-0.0268955	VHL	7428
cg16977858	0.168946	NT5DC2	64943
cg17910105	-0.047839
cg18016254	0.0109274	PARP15	165631
cg18507138	-0.0339303	LRRC3B	116135
cg18984151	0.00767658	C3orf75	NA
cg20503117	-0.0112925	ARL8B	55207
cg23448348	-0.0358276	RBP1	5947
cg23487312	0.249628	CADPS	8618
cg24075208	0.00598031	MST1	4485
cg24877842	-0.0268511	TRAK1	22906
cg25358853	0.00979611	CCRL2	9034
cg27280037	0.096291
cg01511232	0.00585521
cg02353258	0.176255	MGC45800	NA
cg06226630	0.103823	ZAR1	326340
cg06294766	-0.151157	RNF175	285533
cg10127275	-0.0735142
cg10766585	0.00824108	SOD3	6649
cg12058185	-0.123825	FAT4	79633
cg13640145	0.0828195	LOC100192379;TMEM155	NA
cg14018231	-0.144777	TIFA	92610
cg15148757	-0.0471725	AFF1	4299
cg15972560	-0.180647
cg18053492	-0.0998158
cg19273995	-0.112092
cg22066108	-0.202685	LRPAP1	4043
cg25503695	0.213573	CPLX1	10815
cg02312593	0.0496665	PCDHGA1	56114
cg03060468	0.000299187	SLC25A2	83884
cg05209493	-0.116682
cg05569203	-0.0349945	PLCXD3	345557
cg06638012	0.0103203	AFF4	27125
cg14684434	0.0897442	SNX18	112574
cg15015757	0.0283685	LOC153684	NA
cg17432513	-0.00868587
cg17588578	-0.0127815	PCDHGA2;PCDHGA3;PCDHGA1	56113;56112;56114
cg17741986	0.000442748	ZNF454	285676
cg22571664	1.3534e-05	NPR3	4883
cg23941075	-0.0299535	PCDHB15	56121
cg26060817	-0.0816181	TRIO	7204
cg26314399	0.21581	PLEKHG4B	153478
cg00099766	-0.0101519	RRAGD	58528
cg00590036	0.0153883	TMEM181	57583
cg01810111	0.446291
cg01959541	-0.0198428
cg02701019	-0.172888	STX11	8676
cg04019983	0.0431245	MICB	4277
cg04676561	0.00891063	HIST1H1B	NA
cg04940526	-0.0311769	IER3	8870
cg05917988	0.108703	AARS2	57505
cg06097213	-0.135732	LOC285830	NA
cg06952873	0.190782	ZSCAN12L1	NA
cg07249406	0.0447457	GLO1	2739
cg07972954	0.0572202	TUBB	203068
cg11393995	-0.0117529	SERPINB1	1992
cg13520736	-0.135675	TPD52L1	7164
cg14284211	-0.423648	FKBP5	2289
cg15305352	0.269074
cg16322598	-0.0896881	C6orf127	NA
cg16549027	0.0625303	CUL9	23113
cg20596647	-0.0120119	FYN	2534
cg24187051	6.7728e-05	ZNRD1;NCRNA00171	NA
cg24266485	-0.0617725	HLA-DPB2	3116
cg24479522	-0.061237	LTB	4050
cg24644551	0.0261743
cg24799187	0.0876834
cg26824091	0.0651642	GLO1	2739
cg27166718	-0.0896775	PLN;C6orf204	5350;NA
cg27365342	0.136006	PHACTR1	221692
cg27368911	-0.0424652
cg00323915	0.0663555	GIMAP4	55303
cg04162299	-0.261219	DOCK4	9732
cg04317940	-0.154462	PMS2;AIMP2	5395;7965
cg04516975	-0.102887	FAM133B	257415
cg07626700	0.0934903	NOM1	64434
cg10389644	0.210837	MAFK	7975
cg11462165	0.120283
cg12164596	0.410081	MNX1	3110
cg13557337	-0.289112
cg17167790	0.0764274	PTPRN2	5799
cg17264513	-0.125201	NXPH1	30010
cg17437939	0.0146783	TAC1	6863
cg17632372	0.114639
cg18170071	-0.00233997	PAX4	5078
cg20692569	0.538111	FZD9	8326
cg21828951	-0.0546166	CUL1	8454
cg21959598	-0.115888	VOPP1	81552
cg00569813	-0.0666403
cg01977082	-0.123706	COX6C	1345
cg04103837	-0.00304485	CPA6	57094
cg05029558	-0.0444576	XKR9;LACTB2	389668;51110
cg05236677	0.0549583
cg05412333	0.0419576	GATA4	2626
cg06331333	-0.128009
cg07664990	-0.0330383
cg09535960	-0.107908	LOXL2	4017
cg11263617	-0.0801293
cg12784848	0.235529	TNFRSF10A	8797
cg15565897	0.416976
cg18335796	0.183642	CALB1	793
cg19134704	-0.0470883	KCNQ3	3786
cg22975816	0.142714	EXT1	2131
cg23217680	0.0447601
cg24434118	-0.0448392	TP53INP1	94241
cg26400840	0.0432998	TNFRSF10A	8797
cg27043838	0.0805371	DLGAP2	9228
cg00449000	-0.0857049	FNBP1	23048
cg03679581	0.0521315	RLN2	6019
cg06230664	-0.12392
cg06836406	0.131118
cg13425938	-0.172871	EGFL7	51162
cg13579295	0.196094	ANAPC2	29882
cg13989834	0.00259737	UCK1	83549
cg14176274	-0.0410182	DMRT3	58524
cg14221644	-0.00708885
cg21266178	-0.000842219	VAV2	7410
cg25766046	0.156871	ROR2	4920
cg26381783	0.131075	KANK1	23189
cg27649981	-0.119199
cg03558688	-0.134953
cg03634479	-0.282553	CACNB2	783
cg06092948	-0.139448	IFIT2	3433
cg09330153	-0.0375805	KIAA1217	56243
cg09610735	-0.0292514	BMI1	648
cg13719243	0.310556	PRKG1	5592
cg13929328	0.172721	FOXI2	399823
cg14008883	-0.128945	SLC18A3;CHAT	6572;1103
cg16284507	-0.0351393
cg16902509	-0.312817	ITGA8	8516
cg17716358	0.0545012	TSPAN14	81619
cg19007269	-0.41055	SH3PXD2A	9644
cg19876672	0.551458	VAX1	11023
cg20014988	-0.138238	SGMS1	259230
cg23046844	-0.0103666
cg27137983	0.125918	HMX2	3167
cg27292694	-0.040115	SVIL	6840
cg02586730	0.120219	EFEMP2	30008
cg03303857	-0.0239849	GRIK4	2900
cg03631561	-0.0785681	YPEL4	219539
cg04898797	0.00191363	MAP4K2	5871
cg06969777	-0.177782	LRP5	4041
cg08122151	0.136204
cg10006762	-0.00120339	EHBP1L1	254102
cg12187358	-0.00881099	LAYN	143903
cg12444117	-0.0292376	ADAMTS15	170689
cg13202816	0.114425	EIF3M	10480
cg13582001	-0.386905	EPS8L2	64787
cg13877574	-0.11998	HCCA2;LOC402778	NA
cg15806306	0.0274996
cg18787012	0.0860358	INSC	387755
cg22675791	-0.0495479	DGKZ	8525
cg22975913	0.105304	WIT1;WT1	NA;7490
cg23084245	0.0393955
cg24020398	0.0156784	CCND1	595
cg24808318	-0.00180212	CTSF	8722
cg26166595	-0.220194	DKK3	27122
cg27115340	-0.0390405	SCN4B	6330
cg27121267	-0.205347	ACRV1;CHEK1	56;1111
cg27142536	0.00662883
cg01641177	-0.0405925
cg02732509	0.306526	CTDSP2	10106
cg03020208	0.40138	AQP5	362
cg03163184	-0.0666957
cg03933279	0.00048958	GPR19	2842
cg08501420	-0.0363546
cg11084474	-0.00997162
cg11090409	0.0497198	KRT83	3889
cg12029105	-0.0858189	TMEM233	387890
cg15266205	0.0395332	PTPRO	5800
cg15284911	0.00153679	MGST1	4257
cg18660363	0.224495	AVPR1A	552
cg19496587	-0.305238	C12orf53	NA
cg22830707	0.0832887	HOXC13	3229
cg24824245	-0.141087	CMAS	55907
cg25884442	0.00899433	VWF	7450
cg26153631	-0.013068	HOXC10	3226
cg26297688	0.00519547	C12orf23	NA
cg26911787	0.095467	ELK3	2004
cg02057782	0.0533686	ATP8A2	51761
cg03084901	-0.0445505	ZIC2	7546
cg06648759	0.12576
cg07860673	0.171646	PDX1	3651
cg13241077	-0.0378747	FAM194B	NA
cg19802138	0.173602	SOX1	6656
cg20810684	0.00437772
cg23361092	0.263251
cg25008813	-0.0284979
cg00244040	0.0461199	PRKCH	5583
cg00747975	-0.0841546	C14orf166B	NA
cg02135821	-0.110792	DDX24	57062
cg02181506	0.0527838	SERPINA1	5265
cg07965823	0.0478559	ISM2	145501
cg09635533	-0.017229
cg11528307	-0.00406517	C14orf80	NA
cg12166570	-0.000841814	C14orf43	NA
cg14342714	0.083907
cg16792632	0.248286	ESR2	2100
cg18484220	0.115861
cg23519812	-0.102623	ACOT2	10965
cg24035598	0.0150499
cg04878701	-0.248797
cg06330618	0.011951	FES	2242
cg07713411	0.306752
cg09750144	-0.00566005	PCSK6	5046
cg10342908	-0.0148415
cg13288195	0.062836	FBXL22	283807
cg17180386	-0.0257078	TNFAIP8L3	388121
cg18866529	-0.0361005	C2CD4A	145741
cg23684204	0.0234148	RCCD1	91433
cg25700533	-0.182139	DNAJC17;C15orf62	55192;643338
ch.15.68126615R	-0.152576
ch.15.1556816R	-0.257206	SEMA4B	10509
cg00004055	-0.00367367	CKLF	51192
cg00495433	0.0110154	CACNA1H	8912
cg01393115	-0.126511	DEXI	28955
cg02712546	-0.220698	WWP2	11060
cg03033688	-0.188786	HS3ST2	9956
cg04234063	-0.1693	ZNF75A	7627
cg05245533	-0.0767255
cg05766489	0.030082
cg05867134	0.136727	STX1B	112755
cg06353259	-0.0753694
cg06359968	-0.0245859	ZFPM1	161882
cg07512993	-0.173937	TK2	7084
cg07794367	-0.0289804	SHISA9	729993
cg07838048	0.00543668	MTSS1L	NA
cg08310088	-0.218008
cg08623215	-0.348546	GPRC5B	51704
cg09212468	0.249268	CCDC135	NA
cg09764984	0.187907	DNASE1	1773
cg11220950	0.605352	SYNGR3	9143
cg20280492	-0.0154357
cg25033993	-0.153121	STX1B	112755
cg26449586	-0.272657	C16orf86;C16orf48	388284;NA
cg26596350	-0.00983132	GSG1L	146395
cg26639710	0.0536993	PPL	5493
cg27449255	-0.110907	WWP2	11060
cg01019770	0.00892025	RTN4RL1	146760
cg01474257	0.18763	PYY	5697
cg01667702	0.000725076	TRAPPC1;CNTROB	58485;116840
cg01870907	-0.00188061
cg02132824	-0.190277	C17orf56;C17orf89	NA
cg03982355	-0.053914	KCTD11	147040
cg04380519	-0.0323009	LIMD2	80774
cg05323725	0.00275324	LHX1	3975
cg06377635	-0.276024	GAS7	8522
cg06478699	-0.0968913	MYO15A	51168
cg06487191	0.0414459
cg07572790	0.0295788
cg10225491	-0.023186	TMEM93;TAX1BP3	NA;30851
cg12969595	-0.0373384	TMEM98	26022
cg13415865	0.162796	RAP1GAP2	23108
cg14204735	-0.0355697	CYB561	1534
cg14215472	-0.00937468	ANKRD13B	124930
cg14901671	0.0024707
cg15468668	-0.218234	ASGR1	432
cg16316944	-0.0502396
cg16652063	0.0182082	SLC13A5	284111
cg17472428	0.110858
cg17639046	0.109398	HS3ST3B1	9953
cg19755171	-0.0966219	AZI1	NA
cg20327784	-0.0953073	SAP30BP	29115
cg21325732	0.185924	CENPV	201161
cg21706229	0.218695
cg22291359	-0.00736726	NCOR1;PIGL	9611;9487
cg22787468	-0.0253469	SEZ6	124925
cg23279833	0.0101691	RNF157	114804
cg23434413	0.0119176	HOXB8	3218
cg24016054	0.42059
cg26697929	-0.00178725	SDK2	54549
cg12929678	0.00143824	CD226	10666
cg25453381	0.215668
cg26974111	0.110896	CIDEA	1149
cg00073090	-0.0136814
cg00286125	0.0693306	HSPB6	126393
cg00820995	0.131461	CACNG7	59284
cg01049674	-0.0224031	SPTBN4	57731
cg01895740	-0.167376	CLEC4GP1	440508
cg02666638	-0.0129928	CNTD2	NA
cg03018163	-0.17149	LMTK3	114783
cg03509094	0.0673968	EVI5L	115704
cg06942685	0.244108	ZNF542	NA
cg09911521	0.251003	NRTN	4902
cg10789314	-0.309299
cg11088931	-0.0640542	SLC25A23	79085
cg14060828	-0.150844	PTH2	113091
cg15231794	2.00035e-06	TNFAIP8L1	126282
cg16836589	-0.177584	CCNE1	898
cg18861572	-0.185512
cg20104456	-0.0635618	KLK13	26085
cg22048922	0.116842	ITGB1BP3	NA
cg27530093	-0.184093	CCDC97	90324
cg00306090	-0.0137432	VPS16;FAM113A	64601;NA
cg02687417	-0.13847	SDC4	6385
cg04043642	0.10643	BMP7	655
cg06473773	0.613779	LOC388796;SNORA71D	NA;677840
cg11657817	-0.0728323	CST11	140880
cg12633911	0.0011956
cg12880227	0.00997626
cg13657510	0.0187391	FLJ16779;NKAIN4	100192386;128414
cg18904194	-0.00338234	DLGAP4	22839
cg19239041	0.107561	RASSF2	9770
cg21183502	0.0436317	C20orf177;PPP1R3D	NA;5509
cg22298487	-0.273335	SRMS	6725
cg24519157	0.105218	CASS4	57091
cg25839744	0.098186	FAM65C	NA
cg02370100	-0.104141	ABCG1	9619
cg03067912	-0.0768415
cg04753583	0.0837511
cg08538752	-0.0770506	TPTE	7179
cg13062913	0.148299	NCAM2	4685
cg00996986	-0.00907529	SERHL	94009
cg03131358	-0.0595532	CCDC134	79879
cg04134965	0.0914621	PARVB	29780
cg04337944	-0.054247	FBLN1	2192
cg12020533	-0.147158
cg17564844	-0.00257306	RTDR1;GNAZ	NA;2781
cg20300500	0.000160884
cg25257766	-0.042552	PARVB	29780

## Sheet: Supplementary Table 3
Supplementary Table 3. The optimal Elastic Net predictor representing the Neu-Sin clock. Columns label the probeID, the estimated regression coefficient, gene symbol and NCBI Identifier.
Probe	β	Gene Symbol	NCBI ID
cg10626816	0.625577
cg13571388	0.00018867
cg17826530	1.46507
cg06711298	-4.98991	SEMA4C	54910
cg08193650	2.81063	ZFP36L2	678
cg10442729	3.33652
cg17343483	-8.36567	SEMA4C	54910
cg20361600	-7.56152	DLX2	1746
cg21185289	-2.21761	TLX2	3196
cg16369288	2.23884	ZNF167	NA
cg22702772	5.35368	CELSR3	1951
cg26856080	18.8822	TRIM59	286827
cg06385118	-1.53779	LOC441046	NA
cg18171715	18.4692	GAK	2580
cg18586891	0.301607	TMEM175	84286
cg05477834	-0.467913	PCDHB17	NA
cg15690342	0.729669
cg18635552	-9.17938	IRX1	79192
cg18745317	0.0464594
cg25108022	7.83389	DUSP1	1843
cg00537387	-2.89767	DOM3Z;STK19	NA;8859
cg08692175	-21.346
cg25739875	9.0502	TFAP2A	7020
cg18048071	0.57112	VIPR2	7434
cg19421584	0.473571	WDR60	NA
cg22493372	0.119485	LAT2	7462
cg02324367	0.00236886	ARHGEF10	9639
cg05492433	-1.30194	COL22A1	169044
cg16241714	57.9457	CEBPD	1052
cg26003909	-2.42183
cg15312497	0.0869653	ZNF438	220929
cg18193259	8.16553	SLIT1	6585
cg19830950	-0.00261689
cg27250032	0.815366
cg01097384	2.83641
cg15974867	4.17763	CCND1	595
cg20411756	3.69319	DRD4	1815
cg20887442	-0.00123504	NUMA1	4926
cg23623667	-3.19687	KCNQ1	3784
cg01866431	-3.07623	GLT1D1	144423
cg03310242	2.83995	FKBP4	2288
cg21125095	-0.233652
cg23390118	2.32977	CACNA1C	775
cg04795700	-0.858393	MCF2L	23263
cg06072822	-0.427593	MCF2L	23263
cg10407646	0.0247904
cg12939648	0.0431338
cg21749794	0.0148055	RASA3	22821
cg24765648	0.216075	KIAA0284	NA
cg26965915	0.0215865	FLVCR2	55640
cg13039199	-1.55292	SLCO3A1	28232
cg25208479	-1.24535
cg25649641	15.0181
cg00510552	-0.170197	NMRAL1	57407
cg02313331	14.5565	SLC7A5P1	81893
cg06459921	3.78093	ZNF598	90850
cg10270293	0.000688911
cg22183053	-11.4084	EPN2	22905
cg23148631	-5.20018
cg05080154	24.1968	SALL3	27164
cg06944092	-2.02396	APLP1	333
cg07064197	-0.251173
cg14782883	-1.98431
cg15410236	1.36853	ARID3A	1820
cg17768491	0.00228807	SPTBN4	57731
cg18064256	4.95816	PPP1R13L	10848
cg00309582	-9.56371	BMP7	655
cg04432319	0.956216	ISM1	140862
cg12283302	-12.9286
cg12664209	1.67431	ISM1	140862
cg16810054	-0.877478	TP53INP2	58476
cg01961447	27.886	GALR3	8484
cg00022054	-2.69721
cg00105640	-0.21095	LOC388588	NA
cg00850481	0.0149148
cg00957516	-5.81967	CADM3	57863
cg01915081	-1.40831	LCE1F	353137
cg01925498	-0.162949
cg02278414	0.620983
cg02290550	0.023908	SLFNL1	200172
cg02605776	4.24124	C1orf103	NA
cg02625804	2.02474	KIAA1026	NA
cg02931398	-0.0531067
cg03371205	-26.9766	LYPLA2	11313
cg03438943	3.15908	NTRK1;INSRR	4914;3645
cg03458344	-3.94343	C1orf129	NA
cg03954393	0.0010387
cg04093047	0.21448	LOC100128071;TSSK3	NA;81629
cg04484579	0.107386	NPR1	4881
cg04746890	-2.14526
cg04991639	-0.0908892
cg05039548	0.102364
cg05308979	3.11486	C1QC	714
cg05602648	6.08987	COG2	22796
cg06034933	1.33115	HIST3H2A;HIST3H2BB	NA
cg06529149	0.258346
cg06754224	-0.00136316	SESN2	83667
cg06927217	-0.0531893
cg06968741	-0.134717	ACTN2	88
cg07142667	1.32535	SOX13	9580
cg07159230	0.399134	CASZ1	54897
cg07978029	-7.75797
cg08251427	-0.0672766
cg08453036	-4.06518	KCNK2	3776
cg08708961	-0.0830118	PSEN2	5664
cg09131339	-3.39597	SORT1	6272
cg09182435	0.0530322	CAMTA1	23261
cg09417355	-0.570848	LCE6A	448835
cg09502502	-0.205076	PSRC1	84722
cg09674468	0.103572	SLC35F3	148641
cg09938164	0.535599	WNT4	54361
cg10092779	0.474653
cg10632229	-10.01	H3F3A;LOC440926	NA
cg10818339	-0.00289885	AVPR1B	553
cg11223365	-1.90241
cg11334004	-22.4735	MFSD4	NA
cg11377047	-0.00195862	MIR1976;RPS6KA1	100302190;6195
cg11735311	3.86523
cg12143651	-0.186715	ESPN	83715
cg12369402	-0.609991
cg12604162	0.242105	KCNAB2	8514
cg12689670	-0.000712064	LAMC1	3915
cg12810233	11.7201	GFI1	2672
cg13493250	-0.415222	LCE1F	353137
cg14198472	0.0814137	ZNF642	NA
cg14258285	0.0889305	GUCA2B	2981
cg14530937	-1.62355
cg14832908	-0.410096	HES2	54626
cg14995214	1.28744	CHD5	26038
cg15009232	1.97196	AGBL4	84871
cg15114328	-0.427852	GLUL	2752
cg16357582	-6.51514	CSRP1	1465
cg17241310	5.28279	BARHL2	343472
cg17282145	-0.384822	C1orf198	84886
cg17476910	9.80392
cg17934948	-0.137568	KCNK2	3776
cg19027507	-1.59986	TRNP1	388610
cg19367256	-0.0136468	IGSF21	84966
cg20287514	-0.0244503	LDLRAP1	26119
cg20288565	4.04992	GNG4	2786
cg20947849	-0.56673	CAMTA1	23261
cg21172814	2.11798	LHX4	89884
cg21291672	0.0691688	TMEM200B	399474
cg22224597	7.31277	CTPS	NA
cg22796458	0.0489124	UBQLN4	56893
cg23241456	-2.20428	CACNA1E	777
cg23588217	0.717186	TBX15	6913
cg24642169	0.192091
cg24675344	-0.169775	KCNN3	3782
cg25193276	4.4897
cg25720825	0.0334424
cg25773695	0.800811	VANGL1	81839
cg26328954	0.354839
cg26608693	0.0146675	PRDM2	7799
cg27305939	0.00569033	MORN1;LOC100129534	79906;100129534
cg00754604	-0.969408	RBMS1	5937
cg01698448	-1.44602
cg02375320	14.1243	SFRS7	NA
cg04364219	0.132363	SIX2	10736
cg04431946	-1.35484	KCNK12	56660
cg04905635	0.0145602	CCDC74A	90557
cg05136263	0.038306	SIX2	10736
cg05208178	8.06141	INPP5D	3635
cg05501761	-0.372154	ANKRD23	200539
cg05942128	0.0142367	HOXD11	3237
cg07720856	0.664213	PTMA	5757
cg08390172	-1.26897	SDPR	NA
cg09058748	3.09949	CD8A	925
cg09757158	2.96967
cg11123644	4.56917e-05	TTLL4	9654
cg11974162	0.0422025
cg16829809	-0.0811208
cg19198913	-0.0212188
cg19638398	-3.80145	MYEOV2	NA
cg20340242	-0.00213994	IL1R2	7850
cg20401130	-1.18415
cg21967368	1.18881	CPS1	1373
cg21995710	-0.993165	YIPF4	84272
cg22162281	4.77342	ZDBF2	57683
cg22344631	-2.84184
cg25046074	-4.48992	EFEMP1	2202
cg25245161	-1.62754	ARHGEF4	50649
cg25752754	-2.05993
cg25946605	5.28299	CYS1	192668
cg26002103	0.72283	DLX2	1746
cg26009035	0.00378967	CHCHD5	84269
cg27092594	0.000309465
cg00489219	6.64771	ZNF621	285268
cg00492118	-0.163206	SPSB4	92369
cg01002529	-14.7307
cg01797381	-0.792823	IL17RD	54756
cg02741548	-0.40019	GADL1	339896
cg03447908	0.804253	CLEC3B	7123
cg04347582	-0.019933	GATA2	2624
cg04834794	29.4469
cg04884090	1.47351	TRAIP	10293
cg06090362	6.75508	TRIM42	287015
cg06162423	-0.000218005	IGSF11	152404
cg07130266	0.0144922	RASSF1	11186
cg12442404	-9.63474	DIRC2;HSPBAP1	NA;79663
cg13903087	10.9966	ERC2	26059
cg15166900	-1.31625	ARL6IP5	10550
cg16282527	-8.53622	VHL	7428
cg16977858	14.8343	NT5DC2	64943
cg17655346	-0.355584	CACNA2D3	55799
cg18016254	2.73965	PARP15	165631
cg18984151	0.453944	C3orf75	NA
cg19551485	0.0121416	C3orf51;ERC2	NA;26059
cg21569635	0.199162	PLSCR2	57047
cg23487312	4.34675	CADPS	8618
cg23502565	-0.0356718	VEPH1;PTX3	79674;5806
cg24075208	0.0187782	MST1	4485
cg24163658	0.656193	DNASE1L3	1776
cg24317285	0.0601161	SHOX2	6474
cg25358853	2.54351	CCRL2	9034
cg25493589	-0.0177228	CCK	885
cg25635352	5.45459	B3GALNT1	8706
cg27280037	4.68656
cg01511232	1.55257
cg02353258	1.02543	MGC45800	NA
cg03876618	-2.79852	IGFBP7	3490
cg03925294	-0.165167
cg05710982	-0.0262727
cg06173470	1.45837	RNF212	285498
cg06226630	1.27816	ZAR1	326340
cg07695269	-0.000133397	SORCS2	57537
cg09468051	0.659839
cg10019467	0.00754046	RBM47	54502
cg10127275	-15.0032
cg10766585	1.73513	SOD3	6649
cg12058185	-17.7928	FAT4	79633
cg13640145	0.298821	LOC100192379;TMEM155	NA
cg14018231	-0.121453	TIFA	92610
cg14771077	-0.220674	LOC100130872-SPON2;SPON2	NA;10417
cg14841879	1.49006	PALLD	23022
cg15148757	-3.90095	AFF1	4299
cg17714291	1.72272
cg18053492	-1.07398
cg18887962	-0.00219434
cg19273995	-3.09121
cg22066108	-7.71006	LRPAP1	4043
cg23207324	-0.357986
cg26300517	0.0194798
cg00096447	-0.101697
cg00325750	0.0104834
cg01601628	1.09525	CD74	972
cg02312593	0.745111	PCDHGA1	56114
cg02434007	-0.149131	SRA1	10011
cg02599626	-0.0179023	LPCAT1	79888
cg04056384	0.0392314	PCDHB17	NA
cg04635983	-0.616764
cg05209493	-0.0187524
cg06638012	2.65744	AFF4	27125
cg07289335	0.0233777
cg07608474	1.81445	PCDHGA4;PCDHGA12;PCDHGA11;PCDHGA9;PCDHGA1;PCDHGB1;PCDHGB6;PCDHGB3;PCDHGB7;PCDHGA6;PCDHGA8;PCDHGA10;PCDHGA5;PCDHGB4;PCDHGA3;PCDHGA2;PCDHGB2;PCDHGA7;PCDHGB5	56111;26025;56105;56107;56114;56104;56100;56102;56099;56109;9708;56106;56110;8641;56112;56113;56103;56108;56101
cg08451582	-0.00578701	NEUROG1	4762
cg09560590	-0.00473287	HMHB1	57824
cg10864056	-2.64789
cg14590843	11.5181	GDNF	2668
cg14684434	3.15364	SNX18	112574
cg14714391	-3.75506	F2R	2149
cg14919554	3.29991
cg15602329	0.408507	FSTL4	23105
cg15623892	0.232673	SNX2	6643
cg16263180	-0.283737	PCDHGA1	56114
cg16621364	0.0613442	PCDHGA4;PCDHGA2;PCDHGA5;PCDHGB2;PCDHGA1;PCDHGB1;PCDHGA3	56111;56113;56110;56103;56114;56104;56112
cg17432513	-1.05087
cg17588578	-2.5751	PCDHGA2;PCDHGA3;PCDHGA1	56113;56112;56114
cg17741986	2.18619	ZNF454	285676
cg18920976	0.0473271	ETF1	2107
cg19735421	-0.00211851	F2R	2149
cg19903596	-0.21693
cg19936812	0.384287
cg23941075	-6.1522	PCDHB15	56121
cg24573501	-2.17924	F2RL1	2150
cg00024396	-0.929612	ELOVL5	60481
cg00590036	6.16816	TMEM181	57583
cg00609135	0.00266043
cg00640087	2.5739	MSH5	4439
cg00664730	0.140676
cg01785233	-0.491104
cg01810111	5.73517
cg01850269	0.483915	SIM1	6492
cg02701019	-7.00945	STX11	8676
cg03160135	4.76822	VGLL2	245806
cg04002618	-3.04918	PHACTR2	9749
cg04019983	5.70435	MICB	4277
cg04103532	-2.85378	HIVEP2	3097
cg04214566	-0.552558	HCG4	54435
cg04676561	8.4346	HIST1H1B	NA
cg04983903	-0.215773	HLA-J;NCRNA00171	3137;NA
cg05769902	0.000561004
cg05917988	9.69638	AARS2	57505
cg06097213	-3.12526	LOC285830	NA
cg06250886	-3.35861
cg06952873	0.928775	ZSCAN12L1	NA
cg07249406	4.59979	GLO1	2739
cg07972954	0.0133362	TUBB	203068
cg09226692	0.0353669	DLK2	65989
cg10369319	-4.3575	LOC442245	NA
cg10507304	-0.00136043
cg11304212	-0.0916502	UHRF1BP1	NA
cg11393995	-0.0119565	SERPINB1	1992
cg11870956	-0.00790227	NRM;KIAA1949	11270;NA
cg12673978	0.926853
cg13520736	-10.6651	TPD52L1	7164
cg13830081	6.29306	TFAP2A	7020
cg14064694	0.701753	HIST1H2BI	NA
cg15305352	11.6761
cg15414638	-0.0318692
cg15962969	0.260358	NHSL1	57224
cg16184008	0.124056	TMEM217	221468
cg16322598	-0.304166	C6orf127	NA
cg16549027	4.94866	CUL9	23113
cg16952974	0.886386
cg20596647	-0.0821436	FYN	2534
cg21119074	-0.0031687	MBOAT1	154141
cg22972972	0.0140738	ULBP1	80329
cg23313031	-0.00613483	HLA-J;NCRNA00171	3137;NA
cg24187051	0.0875216	ZNRD1;NCRNA00171	NA
cg24479522	-1.7697	LTB	4050
cg25397973	0.0299682
cg26192612	0.0155948	C6orf155	NA
cg26401541	-0.539728
cg26824091	12.0184	GLO1	2739
cg27166718	-4.32435	PLN;C6orf204	5350;NA
cg27368911	-3.78051
cg00323915	4.98168	GIMAP4	55303
cg00338080	0.00345134	SRRM3	222183
cg03776080	-0.295245	IGFBP3	3486
cg04162299	-0.0665676	DOCK4	9732
cg04317940	-22.1206	PMS2;AIMP2	5395;7965
cg04516975	-7.31956	FAM133B	257415
cg04674755	-1.00044
cg05928186	-1.39104	HOXA6	3203
cg06840109	0.00994574
cg07212384	1.27903	GAL3ST4	79690
cg07626700	2.69939	NOM1	64434
cg08657654	-0.00807809
cg10389644	1.00987	MAFK	7975
cg11207515	1.10865	CNTNAP2	26047
cg11854259	0.384358	CNPY1	285888
cg12164596	18.0174	MNX1	3110
cg13557337	-4.4201
cg14311320	0.509296	GPR37	2861
cg15575538	0.763149
cg17167790	5.97933	PTPRN2	5799
cg17264513	-2.16991	NXPH1	30010
cg17437939	3.95044	TAC1	6863
cg17632372	4.49726
cg18170071	-2.34718	PAX4	5078
cg18327157	0.024519	PTPRN2	5799
cg20692569	8.32028	FZD9	8326
cg21370481	-0.0621183	TPK1	27010
cg21959598	-8.2561	VOPP1	81552
cg22511633	1.11723	TBL2	26608
cg23432345	-0.777959	HOXA7	3204
cg25260543	-0.336004
cg26209005	-0.000944457	PLXNA4	91584
cg26759552	-1.36069	LOC100134229;JHDM1D	NA
cg01181233	0.0350718	ADAMDEC1	27299
cg01977082	-6.52146	COX6C	1345
cg04103837	-4.27562	CPA6	57094
cg05029558	-4.46041	XKR9;LACTB2	389668;51110
cg05412333	0.721243	GATA4	2626
cg05938889	0.00633918	SOX7	83595
cg06230848	-8.52566	FAM84B	NA
cg06331333	-2.44629
cg09626984	0.00747446	GATA4	2626
cg11093508	-2.86163
cg12784848	7.89214	TNFRSF10A	8797
cg15565897	10.4041
cg18335796	2.46968	CALB1	793
cg19134704	-7.8063	KCNQ3	3786
cg19135273	0.0402338	FLJ43860	NA
cg22975816	11.3383	EXT1	2131
cg24434118	-13.3159	TP53INP1	94241
cg25216696	4.74661	GATA4	2626
cg25956295	0.0777225	EXT1	2131
cg26400840	3.72554	TNFRSF10A	8797
cg26766403	-0.00221197
cg27043838	3.90338	DLGAP2	9228
cg00375250	3.01456	OLFML2A	169611
cg00449000	-6.42154	FNBP1	23048
cg05286874	-1.73565	ABCA1	19
cg06230664	-3.26601
cg06836406	0.671419
cg13579295	2.7964	ANAPC2	29882
cg13668471	-0.000287112	CNTFR;LOC415056	1271;NA
cg14020278	-3.07034	C9orf86	NA
cg14176274	-0.22899	DMRT3	58524
cg21191737	-0.000742814	TTC39B	158219
cg21266178	-14.108	VAV2	7410
cg22937320	-0.168794	FAM154A	NA
cg23447996	-0.0727194	SYK	6850
cg25766046	10.9007	ROR2	4920
cg26381783	6.90257	KANK1	23189
cg26739510	0.212	C9orf172	NA
cg27649981	-10.5522
cg00057434	-0.872457	ARMC4	NA
cg01341123	-0.000523931	MGMT	4255
cg01512155	-0.659887
cg03634479	-7.81222	CACNB2	783
cg05563110	-0.277691	ADRA2A	150
cg06092948	-2.1808	IFIT2	3433
cg06346505	-0.0835826	AFAP1L2	84632
cg06655361	-2.56224	C10orf54;CDH23	NA;64072
cg09538287	-0.00185791	CTNNA3	29119
cg09610735	-0.229335	BMI1	648
cg12583095	-0.0193061	HTR7	3363
cg13630239	-0.0126013	RRP12	23223
cg13719243	26.1277	PRKG1	5592
cg13929328	0.00602597	FOXI2	399823
cg14008883	-7.03514	SLC18A3;CHAT	6572;1103
cg14826456	2.24505	ADRB1	153
cg16284507	-1.26632
cg16902509	-22.3482	ITGA8	8516
cg17065712	-0.130056	ZMIZ1	57178
cg17262810	-0.144425	CCNY	219771
cg17482424	0.0465853	BAMBI	25805
cg17716358	0.021877	TSPAN14	81619
cg17796960	1.20886	LOC619207	NA
cg19007269	-13.3549	SH3PXD2A	9644
cg19876672	6.55821	VAX1	11023
cg20014988	-3.01629	SGMS1	259230
cg20336571	-2.01139	H2AFY2	NA
cg20339859	-0.000870748
cg23046844	-1.01771
cg25946389	-1.2242	MGMT	4255
cg27292694	-0.2246	SVIL	6840
cg02586730	4.35228	EFEMP2	30008
cg02895447	1.14297	SYT7	9066
cg03303857	-0.000388547	GRIK4	2900
cg04898130	0.0397159	TSPAN18	90139
cg04898797	0.00036036	MAP4K2	5871
cg05033439	0.00928919
cg06969777	-3.30561	LRP5	4041
cg08122151	0.719036
cg11566244	-0.0393116	GSTP1	2950
cg12187358	-5.21628	LAYN	143903
cg12444117	-1.36091	ADAMTS15	170689
cg12883617	-1.30629	UBASH3B	84959
cg13202816	17.4543	EIF3M	10480
cg13582001	-15.0906	EPS8L2	64787
cg13877574	-4.55253	HCCA2;LOC402778	NA
cg14006005	-1.74174	PICALM	8301
cg15806306	2.32139
cg17058475	-0.0104113	CPT1A	1374
cg18787012	9.99801	INSC	387755
cg19238415	-0.0131499	QSER1	79832
cg22975913	0.605379	WIT1;WT1	NA;7490
cg23084245	0.657259
cg24020398	2.83139	CCND1	595
cg26044621	-0.121843	DHCR7	1717
cg26166595	-1.59321	DKK3	27122
cg27121267	-2.53684	ACRV1;CHEK1	56;1111
cg02732509	8.80198	CTDSP2	10106
cg03020208	7.96705	AQP5	362
cg03933279	1.96832	GPR19	2842
cg05970811	0.00694701	SRGAP1	57522
cg06640997	0.00459855
cg11155687	-2.33945
cg13366774	-0.39284	C12orf59	NA
cg14313315	-0.00457561
cg15266205	0.00685249	PTPRO	5800
cg18660363	24.8943	AVPR1A	552
cg18849517	-0.996172	CD27;LOC678655	939;NA
cg19228848	-2.80543	RHEBL1	121268
cg19310515	0.0888153
cg19496587	-23.3978	C12orf53	NA
cg19542346	0.550375	CDK4	1019
cg20884776	-0.00948104
cg22665700	-0.0201233
cg22830707	1.35337	HOXC13	3229
cg23110005	-0.0542251	PTHLH	5744
cg24220733	3.50057	KRT77	374454
cg24445165	0.0149107	RASAL1	8437
cg25936147	-0.215458	HOXC13	3229
cg26019563	-0.000612054	MYL2	4633
cg26297688	0.00357778	C12orf23	NA
cg26386624	-0.322371	HOXC11	3227
cg26911787	2.20196	ELK3	2004
cg00151919	-0.467508	SLC25A15	10166
cg02057782	1.35043	ATP8A2	51761
cg03084901	-7.77946	ZIC2	7546
cg03427330	-0.00823226
cg06648759	2.67056
cg07860673	4.77296	PDX1	3651
cg13241077	-10.9881	FAM194B	NA
cg14743812	0.950459
cg19802138	18.1279	SOX1	6656
cg23361092	2.74794
cg25008813	-3.94131
cg00747975	-0.0150369	C14orf166B	NA
cg01547609	-2.01843	HAUS4	54930
cg02135821	-5.28281	DDX24	57062
cg05182249	20.1836	KCNK13	56659
cg07785447	0.135281	GSC	145258
cg07965823	3.22401	ISM2	145501
cg09721659	-0.911742	TSHR	7253
cg10497871	-0.913673	C14orf184	NA
cg11528307	-14.199	C14orf80	NA
cg13130031	-5.04779
cg14118997	-0.322448
cg14342714	9.31004
cg15393565	-1.83252	ERO1L	NA
cg15895690	0.514916
cg16792632	7.02403	ESR2	2100
cg19546207	0.00238225
cg24035598	10.4337
cg01569660	0.00805907	LOC390594	NA
cg04878701	-11.0912
cg04963480	-0.651568	CT62	196993
cg05627522	0.761493
cg06121469	0.0029395	SPG11	80208
cg07713411	16.1783
cg08638044	-0.291054
cg10342908	-2.63848
cg13288195	2.30189	FBXL22	283807
cg13602438	-0.00446564	MEF2A	4205
cg17180386	-10.5046	TNFAIP8L3	388121
cg18866529	-1.07261	C2CD4A	145741
cg21717017	-8.29634
cg23915487	0.949158	GABRA5	2558
cg25700533	-5.1923	DNAJC17;C15orf62	55192;643338
ch.15.68126615R	-1.44363
ch.15.1556816R	-9.56945	SEMA4B	10509
cg01393115	-1.399	DEXI	28955
cg02712546	-8.3615	WWP2	11060
cg03033688	-2.27461	HS3ST2	9956
cg04234063	-11.1674	ZNF75A	7627
cg04257263	-0.971036	MPG	4350
cg05245533	-3.30483
cg05867134	4.02899	STX1B	112755
cg06271387	-0.724792	A2BP1	NA
cg06359968	-7.00612	ZFPM1	161882
cg06390694	-3.76341	POLR3E	55718
cg07512993	-2.85808	TK2	7084
cg07794367	-2.17368	SHISA9	729993
cg07838048	0.0264657	MTSS1L	NA
cg08079136	0.228544	APRT	353
cg08096786	0.43762	CCDC102A	92922
cg08155347	-0.753881	IL17C	27189
cg08310088	-1.64377
cg08623215	-8.8362	GPRC5B	51704
cg09212468	3.82443	CCDC135	NA
cg09764984	14.8825	DNASE1	1773
cg10294474	2.03502
cg11220950	8.28306	SYNGR3	9143
cg20280492	-1.6472
cg23970785	-2.164	DEXI	28955
cg25033993	-0.000384547	STX1B	112755
cg26449586	-13.6573	C16orf86;C16orf48	388284;NA
cg26596350	-1.99645	GSG1L	146395
cg26613361	-1.05388
cg26639710	0.0306279	PPL	5493
cg01019770	3.05706	RTN4RL1	146760
cg01474257	14.6629	PYY	5697
cg01635193	0.000350535	TMEM101	84336
cg01637609	0.00623007	ITGA2B	3674
cg01667702	2.81078	TRAPPC1;CNTROB	58485;116840
cg01826319	-0.483484
cg01870907	-4.58004
cg02132824	-20.4487	C17orf56;C17orf89	NA
cg02781105	-2.23919	KIF19	124602
cg03832440	-0.102207	HS3ST3B1;MGC12916	9953;84815
cg03982355	-1.43509	KCTD11	147040
cg04374102	-1.56956	TMEM102	284114
cg05323725	4.3448	LHX1	3975
cg06005844	-0.435522	HS3ST3B1;MGC12916	9953;84815
cg06291334	-5.97196	SPOP	8405
cg06478699	-4.74409	MYO15A	51168
cg06487191	7.73021
cg07029411	0.669368	RICH2	NA
cg07572790	0.249335
cg08003321	0.00268675	PIK3R5	23533
cg08701659	-1.10402	TBCD	6904
cg10225491	-9.67593	TMEM93;TAX1BP3	NA;30851
cg12350474	-0.445177
cg12361772	-0.0574883	STX8	9482
cg13415865	6.2904	RAP1GAP2	23108
cg14010578	-0.102534	ACBD4	79777
cg14204735	-0.315233	CYB561	1534
cg14901671	4.89927
cg15468668	-4.88598	ASGR1	432
cg15649236	-0.910689	MIR10A	406902
cg15999590	2.2691	MLX	6945
cg16251357	-0.000292828	C17orf93;PRAC	NA
cg17119387	-0.134803	KIAA0664	NA
cg17472428	0.0199078
cg21706229	3.52166
cg22291359	-1.3307	NCOR1;PIGL	9611;9487
cg22298548	-0.263311
cg22787468	-2.08791	SEZ6	124925
cg23434413	11.4202	HOXB8	3218
cg24016054	0.719448
cg26111518	-1.02738	GHDC	84514
cg26418770	-0.0983141	HS3ST3B1;MGC12916	9953;84815
cg03110300	-0.0343862	CPLX4	339302
cg12929678	0.0299525	CD226	10666
cg21337927	-0.0640595
cg21813303	-0.913699	RPRD1A	55197
cg25453381	5.67776
cg26828842	0.00151003
cg26974111	3.67	CIDEA	1149
cg27631427	0.427926	LIPG	9388
cg00174901	-1.77638	PALM	5064
cg00286125	3.49634	HSPB6	126393
cg00820995	2.90749	CACNG7	59284
cg00835193	-0.285729	LINGO3	645191
cg01510051	-0.157435	ZNF542	NA
cg02726501	0.174994	CACNG7	59284
cg03018163	-7.01789	LMTK3	114783
cg06235973	-0.676864	LOC113230	NA
cg06734993	-1.52353	ATP5SL	NA
cg06748966	0.269017	HCST	10870
cg06942685	7.79151	ZNF542	NA
cg08614301	4.98655	PBX4	80714
cg09911521	12.6733	NRTN	4902
cg10789314	-12.1679
cg11088931	-18.8856	SLC25A23	79085
cg11613450	-0.0109877	PTPRH	5794
cg13157315	-0.690309	ZNF114	163071
cg14060828	-2.46558	PTH2	113091
cg15135657	-0.0281499
cg16626670	-0.0248366	CLEC4G	339390
cg16836589	-9.58697	CCNE1	898
cg17969540	-0.763	GRIN2D	2906
cg18861572	-1.26144
cg19575296	0.147817	MEIS3	56917
cg19981796	0.197027	EVI5L	115704
cg20104456	-1.97691	KLK13	26085
cg20617093	-2.41434	TNFSF9	8744
cg21552653	-3.58177	ZNF470	388566
cg22048922	5.00045	ITGB1BP3	NA
cg22793129	0.031078	MOBKL2A	NA
cg24276035	-0.852958	LIPE	3991
cg26263773	-0.536926
cg26487562	-1.02561	PRKACA	5566
cg27061836	-3.57508	BCAT2	587
cg00306090	-0.0418468	VPS16;FAM113A	64601;NA
cg01529637	3.81306	ZFP64	55734
cg02305261	-0.249598	KCNG1	3755
cg04043642	2.64637	BMP7	655
cg05133591	-0.0142408	NKAIN4	128414
cg06473773	51.7525	LOC388796;SNORA71D	NA;677840
cg06908895	-5.50055	ACSS1	84532
cg11657817	-0.448828	CST11	140880
cg12880227	0.0348489
cg19239041	0.146226	RASSF2	9770
cg22298487	-4.28565	SRMS	6725
cg25183989	0.265913	SYCP2	10388
cg25839744	0.00556952	FAM65C	NA
cg00739644	-0.451483	TMPRSS2	7113
cg02370100	-0.6556	ABCG1	9619
cg04753583	9.08827
cg13062913	7.16708	NCAM2	4685
cg13730618	-0.154475	CLIC6	54102
cg01731685	1.85317	IL17RA	23765
cg03131358	-1.1009	CCDC134	79879
cg03433260	-10.7201	BID	637
cg04134965	1.04728	PARVB	29780
cg09931450	0.550248	EIF3D	8664
cg12020533	-5.45944
cg17564844	-3.02984	RTDR1;GNAZ	NA;2781
cg18001869	0.00749575	CACNA1I	8911
cg18133934	0.00632608	BCR	613
cg20300500	0.383807
cg20509780	-0.319181	FBLN1	2192
cg22897224	0.327168	TOP1P2;PIWIL3	7152;440822
cg25257766	-2.57788	PARVB	29780
cg27187881	-1.09828	NAGA	4668

## Sheet: Supplementary Table 4
Supplementary Table 4. The optimal Elastic Net predictor representing the "BrainClock". Columns label the probeID, the estimated regression coefficient, gene symbol and NCBI Identifier.
Probe	β	Gene Symbol	NCBI ID
cg06645033	0.0629112
cg10501210	-1.43137
cg13782884	0.235617	FAM46B	NA
cg16909962	0.208122	RAB4A	5867
cg18279094	0.0939057	FOXD3	27022
cg25285237	0.0228315	ERMAP	114625
cg23606718	0.176163	FAM123C	NA
cg16369288	0.124145	ZNF167	NA
cg17640485	-0.00526393	TNK2	10188
cg26856080	0.0731679	TRIM59	286827
cg18171715	0.0398	GAK	2580
cg23995914	0.00865195	ZNF518B	85460
cg14848772	0.00653549	HIST1H2AG	NA
cg16701167	0.179481	ME1	4199
cg19291355	0.409297	AARS2	57505
cg04220541	0.104268	KIAA0146	NA
cg06022942	0.331895	FLJ45983;GATA3	NA;2625
cg13327545	0.298418
cg14334161	0.0730298	NODAL	4838
cg08715791	0.670858	NPAS4	266743
cg23091758	0.0471583	NRIP3	56675
cg07887608	0.0514576	SSH1	54434
cg09313745	0.0932167	TSPAN9	10867
cg09567735	0.144345	CUX2	23316
cg24894584	0.174817
cg00092518	0.0848195	PHF11	51131
cg01678790	0.157653	DYNC1H1	1778
cg15341124	0.0218593	DIO3;MIR1247	1735;100302145
cg09254686	-0.306018	UNC45A;HDDC3	55898;374659
cg05507697	0.20949	ANKRD11	29123
cg27322556	0.154496	APRT	353
cg05080154	0.00675529	SALL3	27164
cg12845895	0.0129273	PQLC1	NA
cg07544187	0.193752	CILP2	148113
cg07962143	0.0421084
cg08486065	0.00663597
cg10729426	0.0448345	ZNF549	256051
cg13442820	0.116091
cg17861230	0.111068	PDE4C	5143
cg01232907	-0.0600744
cg01395667	0.0136501	ESPNP	284729
cg01465596	0.0242845	HIVEP3	59269
cg01963297	-0.0158996	KCNN3	3782
cg02625804	0.0347074	KIAA1026	NA
cg02770313	-0.249422
cg02995493	0.0311609	PDE4B	5142
cg03664992	0.0481494	BMP8A	353500
cg05756780	0.0266181	IL6R	3570
cg05938423	-0.0144272
cg07144162	-0.0249089	FAM54B;LOC646471	NA;646471
cg07207669	-0.0538496	EFNA1	1942
cg09131339	-0.154858	SORT1	6272
cg11192270	-0.0113677	ATP13A2	23400
cg13380502	-0.0563376	GPR3	2827
cg14655122	0.0716218	RAP1GAP	5909
cg15393490	-0.305222
cg16574155	0.0362449	C1orf172	NA
cg17935233	-0.0162647	RHBG	57127
cg22813220	-0.00167531	C1orf83;TMEM59	NA;9528
cg23605843	0.107391
ch.1.46653973R	-0.0794728
cg01196788	0.332437
cg02375320	0.0719817	SFRS7	NA
cg03957108	0.250119	OTX1	5013
cg06862545	-0.0294397	SERPINE2	5270
cg12462224	0.0251721
cg13346459	0.0466734	TTC31	64427
cg21595233	0.0936507
cg26002103	0.020135	DLX2	1746
cg01438868	-0.0607133
cg04834794	0.341119
cg06479142	-0.00652938
cg08229360	-0.108847	CTDSPL	10217
cg08991297	-0.117518	MON1A	84315
cg15442678	-0.0953545	ROBO1	6091
cg16604975	0.0192789	MAGI1	9223
cg16977858	0.00896856	NT5DC2	64943
cg23320649	-0.0184	C3orf18	51161
cg23704082	0.0836406	TRIM59	286827
cg24606939	-0.114467	TBC1D23	55773
cg03988540	0.00994577
cg05474265	0.0333883
cg10735361	-0.0505269	CCDC96;TADA2B	257236;93624
cg19929355	0.129361	TEC	7006
cg26210267	-0.0566305	ATP5I	NA
cg00335744	-0.0911636	ELL2	22936
cg06575035	0.0595945	PCDHGA4;PCDHGA2;PCDHGA5;PCDHGB2;PCDHGA1;PCDHGB1;PCDHGA3	56111;56113;56110;56103;56114;56104;56112
cg11387240	-0.117116	SLC22A4	6583
cg15129183	0.0525086	LOC257358	NA
cg17039519	-0.0109609	ERBB2IP	NA
cg19413392	-0.0693667	C5orf24	134553
cg23941599	0.134614	FEM1C	56929
cg01810111	0.0573073
cg02721182	0.172572
cg03750778	-0.0302227	DST	667
cg13799242	-0.100439	HEY2	23493
cg14284211	-0.229072	FKBP5	2289
cg15072612	-0.164209
cg18420781	0.0318164	TRIM10	10107
cg19226017	-0.000745668	FKBP5;LOC285847	2289;285847
cg22719623	0.556464	OPRM1	4988
cg25114611	-0.283703	FKBP5;LOC285847	2289;285847
cg08097417	0.455764	KLF14	136259
cg09832443	0.0891137	CREB5	9586
cg11462165	0.00431839
cg17508941	0.0490704
cg00924265	-0.283878
cg00931944	0.148895
cg02309752	0.0125609
cg20599405	0.0842193
cg22251569	0.0426813
cg22975816	0.0868486	EXT1	2131
ch.8.39446R	-0.0794642
cg14059835	-0.0076311	C9orf78;USP20	51759;10868
cg14331163	-0.211472	RORB	6096
cg20224218	-0.0526315	FAM125B	NA
cg26381783	0.381007	KANK1	23189
cg00982799	-0.0363943	PTPRE	5791
cg04512786	0.0242824	CPXM2	119587
cg08867390	0.0545542	STK32C	282974
cg09780955	-0.00251027	SORBS1	10580
cg10763374	-0.158222	COMMD3;BMI1	23412;648
cg11614536	-0.197155	KIAA1462	NA
cg13543854	0.0239722	FLJ45983;GATA3	NA;2625
cg13601565	0.0303065
cg13719243	0.0604056	PRKG1	5592
cg13848598	0.103819	ADRB1	153
cg18240400	0.148795	ANUBL1	NA
cg23462772	0.237684
cg23683800	-0.089399
cg26142490	-0.100174	ABI1	10006
cg26731008	0.0644433	FAM24A	118670
cg02449461	-0.214948	ARRB1	408
cg03807243	-0.0603687
cg05768047	-0.0480138	AP2A2	161
cg09115116	0.0496711	P2RY6	5031
cg12667048	0.00273668	SHANK2	22941
cg13601739	0.0104981	SLCO2B1	11309
cg15698545	-0.0803096	ME3	10873
cg15700009	-0.00670816	LDHA	3939
cg16028555	0.0293531
cg17592231	0.858524
cg23201812	-0.110538
cg01917080	0.0112955
cg02357838	0.224903	RPL6	6128
cg03020208	0.285518	AQP5	362
cg03468072	0.0177593
cg03747456	-0.150187	KRT80	144501
cg04588079	0.235722	HEBP1;HTR7P	50865;NA
cg04604946	-0.0671022	LRRC23;ENO2	10233;2026
cg07233908	-0.0296479	LETMD1	25875
cg10995426	-0.176584
cg26911787	0.00874424	ELK3	2004
ch.12.2647993F	-0.232277	NCOR2	9612
cg04638655	0.00285323	MIR541	100126308
cg16319578	0.0365223	HSPA2	3306
cg00780810	-0.0108499
cg04090392	0.163543	BNC1	646
cg04483936	0.0542779	CGNL1	84952
cg04624362	-0.129944	SEMA4B	10509
cg06121469	0.108414	SPG11	80208
cg07713411	0.094372
cg09784307	0.423563	RPP25	54913
cg20719038	-0.0215343	RPP25	54913
cg23684204	0.176442	RCCD1	91433
cg01264729	-0.000573868	PARN	5073
cg01283141	0.0445009	DOC2A	8448
cg03140421	0.0797289	HSF4	3299
cg04730825	-0.122026	ABCC1	4363
cg06385324	0.206199	SNHG9;SNORA78;RPS2	735301;677844;6187
cg07188665	0.0116729	HSF4	3299
cg07452625	0.109626	SPG7	6687
cg07663765	0.0282093	KIAA1609	NA
cg08287306	-0.0360977	CKLF	51192
cg09212468	0.0150859	CCDC135	NA
cg10015051	0.0810168	CDH11	1009
cg16303453	-0.000715303	CA7	766
cg26781524	-0.0381471	BCMO1	NA
cg02753187	-0.00790857	CALCOCO2	10241
cg03254161	-0.00495491	DNAH17	8632
cg03710354	0.199778	OTOP2;USH1G	92736;124590
cg06151243	0.0704509
cg06971092	0.032683
cg08049553	-0.0311849	MRPS7;GGA3	51081;23163
cg09563311	-0.169067
cg13415865	0.0413344	RAP1GAP2	23108
cg15001747	0.427784
cg17844831	-0.00456433	RAI1	10743
cg19761273	-0.0713757	CSNK1D	1453
cg23837623	-0.13963	SLC43A2	124935
cg27541691	0.013394	TUBG2	27175
cg27613455	0.0430678	IKZF3	22806
cg05533124	-0.0643354	AQP4	361
cg12312205	-0.027353	DLGAP1;FLJ35776	9229;NA
cg22310062	0.0102512	ESCO1	114799
cg02276695	-0.0384149	ATP13A1	57130
cg02426178	-0.248803	SLC44A2	57153
cg04315771	-0.0582169	NUP62;IL4I1;ATF5	23636;259307;22809
cg07809484	0.112453
cg08313242	-0.0189218	ZNF100	163227
cg09911521	0.0348072	NRTN	4902
cg11722531	-0.0888283	APC2	10297
cg13579112	0.0571775	C2CD4C	126567
cg18109874	-0.0792525	RFX1	5989
cg19399220	0.0423995
cg19916323	-0.0135323	CHERP	10523
cg20324262	-0.0447216	MAST1	22983
cg23018448	-0.00551465	QTRT1	81890
cg27110655	-0.036011	GLTSCR2;SNORD23	NA;692091
cg04548376	0.136518	SNRPB	6628
cg05057932	0.0583586
cg06473773	0.367102	LOC388796;SNORA71D	NA;677840
cg07547549	0.0351335	SLC12A5	57468
cg14212634	-0.011036	ITPA	3704
cg21425802	-0.00831747	WISP2	NA
cg27143370	-0.141923	HRH3	11255
cg20229931	-0.0437993	LSS	4047
cg00141308	0.0233188
cg04065108	-0.0747501	TTLL8	164714
cg05075268	-0.0300336
cg19274703	-0.372549
cg20773033	-0.0871285	PDGFB	5155

## Sheet: Supplementary Table 5
Supplementary Table 5. This table lists all cohorts used in the meta-analysis for assessing age-acceleration in Alzheimers Disease (AD).
Accession	Cohort	Tissue	Disease	n(Sample used)	n(FL control)	n(FL AD case)	n(TL control)	n(TL AD case)	Usage	Data type
GSE125895	Semick	DLPFC	AD	68	47	21	0	0	Meta-analysis	Bulk
GSE43414	Pidsley	PFC, STG	AD	171	24	60	26	61	Meta-analysis	Bulk
GSE80970	Smith	PFC, STG	AD	286	68	74	70	74	Meta-analysis	Bulk
GSE72778	Horvath	FL, TL	AD	70	20	21	6	23	Meta-analysis	Bulk
GSE66351	Gasparoni	FL, TL	AD	128	26	37	26	39	Meta-analysis	Bulk
GSE76105	Watson	STG	AD	68	0	0	34	34	Meta-analysis	Bulk
GSE134379	Brokaw	MTG	AD	404	0	0	179	225	Meta-analysis	Bulk
Abbr: FL: frontal lobe; TL: temporal lobe; OL: occipital lobe; PL: parietal lobe; PFC: prefrontal cortex; DLPFC: dorsolateral prefrontal cortex; MFG: medial frontal gyrus; MC: motor cortex; STG: superior temporal gyrus; MTG: medial temporal gyrus; SC: sensory cortex; VC: visual cortex; WM: white matter; EC: entorhinal cortex; Hippo: hippocampus; THA: thalamus; Stria: striatum; NAc: nucleus accumb…

## Sheet: Supplementary Table 6
Supplementary Table 6. The optimal Elastic Net predictor representing the Glia-In clock. Columns label the probeID, the estimated regression coefficient, gene symbol and NCBI Identifier.
Probe	β	Gene Symbol	NCBI ID
cg10501210	-0.894874
cg13782884	0.477409	FAM46B	NA
cg16909962	0.435857	RAB4A	5867
cg27432653	0.0357434	GFI1	2672
cg16361302	0.0843276
cg23606718	0.456372	FAM123C	NA
cg04187185	0.217135	CCL28	56477
cg22185977	0.0209262	LPCAT1	79888
cg03771840	0.000990979	TRIM15	89870
cg11744777	0.399734	HIST1H4K	NA
cg14848772	0.0102988	HIST1H2AG	NA
cg18468088	0.132534
cg01217984	0.184027	HOXA2	3199
cg12001630	0.106372	RAC1	5879
cg26830108	0.0196905
cg08995871	0.0145178	DUPD1	NA
cg13327545	0.283078
cg14334161	0.264803	NODAL	4838
cg08715791	0.204353	NPAS4	266743
cg23091758	0.123451	NRIP3	56675
cg26942121	-0.129694	ST5	NA
cg10906284	0.13147	AVPR1A	552
cg24894584	0.24999
cg10795666	0.144583	MLNR	2862
cg00809164	0.0443781	MT1L	4500
cg00927231	0.130618
cg04370442	0.0544772	TEPP	NA
cg05507697	0.527462	ANKRD11	29123
cg27322556	0.105823	APRT	353
cg10460946	-0.153641
cg07544187	0.695886	CILP2	148113
cg07962143	0.000420134
cg08486065	0.0855083
cg13442820	0.189997
cg17117277	0.305673	ZFR2	23217
cg22212414	0.0215441	IFNGR2	3460
cg27396655	-0.125675	NPTXR	23467
cg00085493	-0.162948
cg01963297	-0.131365	KCNN3	3782
cg07110659	-0.0149673	LPAR3	23566
cg07181374	-0.0594086	PLEKHG5	57449
cg10574566	-0.296147
cg13102889	0.0442171	HES5	388585
cg13380502	-0.273185	GPR3	2827
cg14413177	-0.00223865	SLC41A1	254428
cg15393490	-0.644353
cg19510626	-0.0825072	MAGI3	260425
cg22785852	-0.0809027	LOC148696	148696
cg24864189	0.0120433
cg25410668	0.305197	RPA2	6118
cg27523527	0.0108888
cg01331772	0.0267219
cg03545227	0.104366	PTPRN	5798
cg04444936	-0.0598916	AGFG1	3267
cg07589899	0.0431498
cg11833003	-0.188882	ARHGEF4	50649
cg12462224	0.151397
cg12757011	0.0832285	TBR1	10716
cg14674720	0.0321663
cg17132535	0.00305323	MCFD2	90411
cg19049194	0.130835
cg19671120	0.209784	CNGA3	1261
cg19716462	0.236641	CCT4	10575
cg23072629	-0.150402	PER2	8864
cg02327109	0.116289
cg06479142	-0.0159996
cg08229360	-0.110967	CTDSPL	10217
cg09834794	0.032887
cg12919119	-0.0159671	CTDSPL	10217
cg15442678	-0.160108	ROBO1	6091
cg16643088	-0.0500808	CSRNP1	64651
cg23320649	-0.082263	C3orf18	51161
cg03988540	0.224468
cg05024939	0.121187
cg11164860	0.0621642	WHSC2	NA
cg11970349	0.0987921	GPR78	27201
cg16558177	0.321791
cg17071446	0.0803079
cg17486101	0.204225
cg17492965	0.000267135	CPZ	8532
cg19929355	0.545491	TEC	7006
cg17039519	-0.0983202	ERBB2IP	NA
cg18054674	0.177358	PCDHGA4;PCDHGA1;PCDHGA6;PCDHGA5;PCDHGB1;PCDHGA3;PCDHGA2;PCDHGB2;PCDHGB3	56111;56114;56109;56110;56104;56112;56113;56103;56102
cg19413392	-0.103374	C5orf24	134553
cg23941599	0.397939	FEM1C	56929
cg26377880	0.0660778	C5orf49	NA
cg02711268	-0.0139924
cg13511576	-0.0610406	CSNK2B	1460
cg14425347	-0.174328	SYNGAP1	8831
cg17284168	0.0944451	SGK1	6446
cg17885226	0.155129
cg22040809	0.117876	HCG11	493812
cg22719623	0.56168	OPRM1	4988
cg23174607	0.100519	PTP4A1	7803
cg25114611	-0.402747	FKBP5;LOC285847	2289;285847
cg25378003	-0.0822194
cg26092675	0.0641534	HIST1H3E	NA
cg00453193	0.0705212	TES	26136
cg02081722	0.095789	C7orf61	NA
cg03781727	0.122474
cg05652666	-0.0521516	PTPRN2	5799
cg10840361	-0.0113825	COG5;HBP1	10466;26959
cg14343652	-0.180465	FLJ43663	NA
cg15454385	-0.100525	PDGFA	5154
cg00924265	-0.155322
cg03263637	0.0883743	ZHX2	22882
cg08387463	0.00576679	ARC	23237
cg08594681	-0.0780824	CLU	1191
cg14285881	0.0602449
cg14331163	-0.175105	RORB	6096
cg14428080	0.0385302
cg14479136	-0.0113025	GPSM1;LOC26102	26086;NA
ch.9.2262725R	-0.0869335	BAT2L1	NA
cg10511988	0.0637036	VAX1	11023
cg10763374	-0.0250027	COMMD3;BMI1	23412;648
cg11614536	-0.185449	KIAA1462	NA
cg26731008	0.199026	FAM24A	118670
cg02449461	-0.0455291	ARRB1	408
cg08203715	-0.0196458	ST3GAL4	6484
cg08587804	0.260713	TRIM44	54765
cg09248429	0.0458563	LOC100133545	NA
cg11307363	-0.0368737	BRSK2	9024
cg15648239	0.013048	USP2	9099
cg15700009	-0.0782074	LDHA	3939
cg26805749	0.201655
cg26972614	-0.0034989	IL18BP	10068
cg01917080	0.209746
cg02357838	0.575194	RPL6	6128
cg03747456	-0.0602725	KRT80	144501
cg04342895	0.0615174	RPL6	6128
cg04604946	-0.0105612	LRRC23;ENO2	10233;2026
cg15110296	-0.00598211	LOH12CR1;LOH12CR2	NA;503693
cg15408855	-0.0655554	TCP11L2	255394
cg16766632	9.27819e-05	LRP1	4035
cg01870657	0.196674	DHRS12	79758
cg14516632	0.0178971	LOC284232	NA
cg04738877	-0.0239004	GALC	2581
cg15480367	0.147982	CHGA	1113
cg17345741	-0.119236
cg00398764	-0.0578731
cg18306747	-0.0277969	STOML1	9399
cg19005438	0.0518139	FOXB1	27023
cg23741520	0.0701022	BNC1	646
cg25590826	0.0169055	CCDC33	80125
cg03140421	0.268872	HSF4	3299
cg03879594	0.0501813
cg07919131	-0.0370538	RHBDL1	9028
cg13752949	-0.0489284	CP110	NA
cg26781524	-0.096368	BCMO1	NA
cg01461824	0.0391628
cg06144905	0.308997	PIPOX	51268
cg06151243	0.142864
cg06647382	-0.0150807	PDK2	5164
cg17844831	-0.238017	RAI1	10743
cg24420717	-0.119967	GRN	2896
cg27401724	-0.108939	ACBD4	79777
cg27455640	-0.330522	CSNK1D	1453
cg27613455	0.307391	IKZF3	22806
cg07433769	0.237073	C18orf1	NA
cg16061498	0.0935188
cg02189888	0.0366984
cg02426178	-0.433292	SLC44A2	57153
cg06444294	-0.0590844	IRF3	3661
cg09555914	0.258593	ZNF773	374928
cg12089570	0.0594589	ZNF177	7730
cg15245120	-0.0483838	ZNF8	7554
cg18109874	-0.00278472	RFX1	5989
cg26268866	-0.0924919
cg27110655	-0.0410629	GLTSCR2;SNORD23	NA;692091
cg05822633	-0.0335798	BTBD3	22903
cg19702785	0.0467037	KCNS1	3787
cg20645040	-0.00154891	ZMYND8;LOC100131496	23613;100131496
cg01093212	-0.112813	SNORD43;RPL3	26807;6122
cg12449837	0.0278252	TUG1;MORC2	55000;22880
cg19274703	-0.511047
cg23124451	-0.0614588	CBX7	23492

## Sheet: Supplementary Table 7
Supplementary Table 7. The optimal Elastic Net predictor representing the Glia-Sin clock. Columns label the probeID, the estimated regression coefficient, gene symbol and NCBI Identifier.
Probe	β	Gene Symbol	NCBI ID
cg10501210	-6.91202
cg13782884	19.9815	FAM46B	NA
cg14419975	2.627
cg16909962	13.6589	RAB4A	5867
cg16361302	1.24304
cg21122225	1.00424
cg23606718	12.7336	FAM123C	NA
cg04187185	2.47919	CCL28	56477
cg18336674	-0.152786	TLX3	30012
cg02578944	1.11309	NKAPL	222698
cg04190475	-2.25751	LYRM4	57128
cg11744777	11.4185	HIST1H4K	NA
cg14848772	1.82479	HIST1H2AG	NA
cg16695576	-1.49596
cg18468088	2.82179
cg20223728	-7.90005	NRN1	51299
cg01217984	5.73286	HOXA2	3199
cg12001630	2.79556	RAC1	5879
cg26830108	1.54669
cg05066959	0.0263817	ANK1;MIR486	286;NA
cg15627457	2.8933
cg13327545	5.64782
cg14334161	12.6551	NODAL	4838
cg17485681	0.600886	CDH23	64072
cg01560972	0.888043	RIC3	79608
cg08715791	3.11952	NPAS4	266743
cg26942121	-6.52174	ST5	NA
cg10378521	-2.81696	FBRSL1	57666
cg10906284	2.26513	AVPR1A	552
cg24894584	8.25953
cg10795666	19.7201	MLNR	2862
cg00809164	1.58391	MT1L	4500
cg00927231	1.44027
cg02727363	-1.16591	EXOSC6	118460
cg04370442	1.63974	TEPP	NA
cg05507697	12.1548	ANKRD11	29123
cg27322556	20.3164	APRT	353
cg10460946	-6.85227
cg16340422	-0.0473429	PLD6	201164
cg22756089	1.01803	DNAH17	8632
cg01335597	0.00663736	CSNK1G2	1455
cg07544187	28.4735	CILP2	148113
cg08486065	2.47677
cg09935271	-2.41796	YJEFN3	374887
cg13442820	14.0638
cg17117277	3.55333	ZFR2	23217
cg27396655	-4.86384	NPTXR	23467
cg00691671	-0.353324
cg01963297	-2.35509	KCNN3	3782
cg04105479	3.46911	EPHA10	284656
cg04349561	0.302116	NBPF3	84224
cg06335143	3.49411	ZYG11A	440590
cg07110659	-2.05275	LPAR3	23566
cg07181374	-2.21826	PLEKHG5	57449
cg07208172	-0.131439
cg10574566	-7.57669
cg12750103	-0.311971	MMEL1	79258
cg13380502	-14.0949	GPR3	2827
cg13997435	-0.759909	S100A2	6273
cg14074486	0.00125496	TOMM40L	84134
cg15393490	-14.7019
cg22785852	-2.31601	LOC148696	148696
cg24507760	-0.163168	LOC148696	148696
cg25410668	6.14872	RPA2	6118
cg27523527	2.32473
cg01381586	-4.31491	ODC1;SNORA80B	4953;100302743
cg01658502	-0.0680107	RUFY4	285180
cg03545227	3.67407	PTPRN	5798
cg04444936	-23.9459	AGFG1	3267
cg05929767	2.22484
cg07589899	1.85186
cg11241151	2.57362
cg11833003	-3.01611	ARHGEF4	50649
cg12462224	3.20192
cg14674720	2.38918
cg18008467	1.37778	AGAP1	116987
cg19049194	2.28796
cg19671120	0.265086	CNGA3	1261
cg19716462	12.4814	CCT4	10575
cg21595233	2.51955
cg25591888	-1.14403	SH3BP4	23677
cg02327109	0.00209122
cg05541640	-0.520042	ABHD14B;ABHD14A	84836;25864
cg06479142	-0.640419
cg07303143	0.307428	KIAA1143;KIF15	57456;56992
cg08229360	-0.0984911	CTDSPL	10217
cg09834794	0.151034
cg10882522	1.25266	IL17RD	54756
cg15442678	-4.72194	ROBO1	6091
cg16643088	-0.734121	CSRNP1	64651
cg23320649	-4.70892	C3orf18	51161
cg03988540	1.12547
cg04237522	-0.244542
cg05024939	2.65156
cg07290920	-0.639938	SLIT2	9353
cg11970349	2.2593	GPR78	27201
cg13578194	-0.0603105	LIMCH1	22998
cg16558177	7.78066
cg17486101	13.1993
cg17492965	1.12053	CPZ	8532
cg19929355	18.3852	TEC	7006
cg01267270	0.0043445	PHAX	51808
cg13995774	-1.46962	MAML1	9794
cg17039519	-1.6116	ERBB2IP	NA
cg18054674	1.59444	PCDHGA4;PCDHGA1;PCDHGA6;PCDHGA5;PCDHGB1;PCDHGA3;PCDHGA2;PCDHGB2;PCDHGB3	56111;56114;56109;56110;56104;56112;56113;56103;56102
cg19413392	-2.75939	C5orf24	134553
cg23941599	7.37108	FEM1C	56929
cg26377880	0.302909	C5orf49	NA
cg02711268	-5.77012
cg03157610	-0.519396	PHF1;KIFC1	5252;3833
cg05457768	0.738375
cg13511576	-5.04294	CSNK2B	1460
cg14425347	-15.0937	SYNGAP1	8831
cg17885226	6.0854
cg22040809	4.50603	HCG11	493812
cg22719623	15.1759	OPRM1	4988
cg23174607	12.6862	PTP4A1	7803
cg24509300	-0.902032	PPT2	9374
cg25114611	-6.77742	FKBP5;LOC285847	2289;285847
cg25378003	-4.89356
cg26092675	1.5329	HIST1H3E	NA
cg00453193	17.9385	TES	26136
cg02169185	2.03459	CUX1	1523
cg03781727	1.66011
cg05652666	-2.05176	PTPRN2	5799
cg10665071	0.240806	DNAJB6	10049
cg10840361	-2.18212	COG5;HBP1	10466;26959
cg14343652	-5.56525	FLJ43663	NA
cg15454385	-3.56923	PDGFA	5154
cg21339533	0.924173	NUPL2	NA
cg24222995	1.42865	TRIL	9865
cg24927974	-0.503424	DPY19L1	23333
cg00924265	-0.383858
cg03263637	4.4672	ZHX2	22882
cg06455149	0.454359
cg07294814	2.13999	GLI4	2738
cg08594681	-4.77894	CLU	1191
cg11329853	-0.194195
cg12640097	0.78903	RPL7	6129
cg25439632	-0.61035
cg14285881	3.4496
cg14331163	-2.04901	RORB	6096
cg14428080	4.93127
ch.9.2262725R	-26.3833	BAT2L1	NA
cg11614536	-11.8105	KIAA1462	NA
cg25718035	-0.88144
cg26731008	2.53249	FAM24A	118670
cg05330963	4.24899	ATPGD1	NA
cg07586868	0.520576	IFITM5	387733
cg08203715	-2.46775	ST3GAL4	6484
cg08587804	3.31762	TRIM44	54765
cg09248429	1.92399	LOC100133545	NA
cg15648239	1.13463	USP2	9099
cg15700009	-0.183546	LDHA	3939
cg24301681	-2.95825	MMP13	4322
cg26805749	4.84262
cg26972614	-0.944399	IL18BP	10068
cg01917080	1.25602
cg02357838	16.2444	RPL6	6128
cg04020713	-0.341463	TENC1	NA
cg04342895	6.15686	RPL6	6128
cg10995426	-2.47382
cg15110296	-0.503781	LOH12CR1;LOH12CR2	NA;503693
cg19181132	-4.65464	LRIG3	121227
cg25045666	2.17263
cg00055462	1.45444	FARP1	10160
cg01870657	6.28246	DHRS12	79758
cg01174771	0.00426609
cg04774505	-0.721679	NRL	4901
cg07527955	-4.83558	FAM158A	NA
cg15480367	6.71316	CHGA	1113
cg21059392	-3.28327
cg22836787	-0.0753664	TDP1	55775
cg00398764	-1.67923
cg05786009	-2.37648
cg18306747	-3.01622	STOML1	9399
cg19005438	0.150785	FOXB1	27023
cg23741520	3.12978	BNC1	646
cg25490410	-5.3464	TUBGCP5	114791
cg03140421	2.35067	HSF4	3299
cg03789791	0.0820076
cg04369306	1.27091
cg07161395	0.218
cg07919131	-2.20636	RHBDL1	9028
cg13752949	-9.94406	CP110	NA
cg26781524	-3.3789	BCMO1	NA
cg01461824	5.13056
cg06144905	3.16239	PIPOX	51268
cg06151243	17.3306
cg06647382	-4.44366	PDK2	5164
cg08903604	-1.47054	MNT	4335
cg12087627	5.28905	ZZEF1	23140
cg17844831	-1.89853	RAI1	10743
cg18499750	1.85484	CYB561	1534
cg22759624	-1.30411
cg24420717	-0.437263	GRN	2896
cg27455640	-4.35795	CSNK1D	1453
cg27613455	11.6385	IKZF3	22806
cg07433769	6.50581	C18orf1	NA
cg16061498	2.49014
cg02189888	0.375563
cg02426178	-7.13865	SLC44A2	57153
cg06444294	-4.26855	IRF3	3661
cg09555914	7.8402	ZNF773	374928
cg12089570	11.3199	ZNF177	7730
cg13300756	2.14196	HAS1	3036
cg15245120	-16.5262	ZNF8	7554
cg18109874	-1.30958	RFX1	5989
cg22331349	0.758308	ZNF577	84765
cg26268866	-7.16873
cg27110655	-8.24161	GLTSCR2;SNORD23	NA;692091
cg04548376	1.14464	SNRPB	6628
cg15607618	-3.783	PTPRA	5786
cg17412248	0.694495	CDH22	64405
cg19702785	4.05981	KCNS1	3787
cg20645040	-3.91525	ZMYND8;LOC100131496	23613;100131496
cg01093212	-3.42466	SNORD43;RPL3	26807;6122
cg12449837	1.25823	TUG1;MORC2	55000;22880
cg19274703	-9.47066
cg23124451	-4.93778	CBX7	23492
